# Supplementary material for: Identifying relationships between sleep posture and non-specific spinal symptoms in adults: A scoping review
Source: PubMed Central journal article supplement — BMJ Open. 2019 Jun 28;9(6):e027633. doi: 10.1136/bmjopen-2018-027633 (PMC6609073; doi:10.1136/bmjopen-2018-027633), 2019-06-28
Supplement: bmjopen-2018-027633.draft_revisions.pdf [file bmjopen-2018-027633.draft_revisions.pdf]

# BMJ Open

BMJ Open is committed to open peer review. As part of this commitment we make the peer review history of every article we publish publicly available.

When an article is published we post the peer reviewers' comments and the authors' responses online. We also post the versions of the paper that were used during peer review. These are the versions that the peer review comments apply to.

The versions of the paper that follow are the versions that were submitted during the peer review process. They are not the versions of record or the final published versions. They should not be cited or distributed as the published version of this manuscript.

BMJ Open is an open access journal and the full, final, typeset and author-corrected version of record of the manuscript is available on our site with no access controls, subscription charges or pay-per-view fees (<http://bmjopen.bmj.com>).

If you have any questions on BMJ Open's open peer review process please email [info.bmjopen@bmj.com](mailto:info.bmjopen@bmj.com)

# BMJ Open

## Identifying relationships between sleep posture and non-specific spinal symptoms in adults: A scoping review

|                               |                                                                                                                                                                                                                                                                                                                                  |
|-------------------------------|----------------------------------------------------------------------------------------------------------------------------------------------------------------------------------------------------------------------------------------------------------------------------------------------------------------------------------|
| Journal:                      | <i>BMJ Open</i>                                                                                                                                                                                                                                                                                                                  |
| Manuscript ID                 | bmjopen-2018-027633                                                                                                                                                                                                                                                                                                              |
| Article Type:                 | Research                                                                                                                                                                                                                                                                                                                         |
| Date Submitted by the Author: | 01-Nov-2018                                                                                                                                                                                                                                                                                                                      |
| Complete List of Authors:     | Cary, Doug; Curtin University, School of Physiotherapy and Exercise Science; AAP Education, Professional Development<br>Briffa, Kathy; Curtin University, School of Physiotherapy and Exercise Science, Faculty of Health<br>McKenna, Leanda; Curtin University, School of Physiotherapy and Exercise Science, Faculty of Health |
| Keywords:                     | sleep posture, sleep position, spinal symptoms, pain, stiffness, education                                                                                                                                                                                                                                                       |
|                               |                                                                                                                                                                                                                                                                                                                                  |

SCHOLARONE™  
Manuscripts

1  
2  
3  
4  
5  
6  
7  
8 Identifying relationships between sleep posture and non-specific spinal symptoms in  
9 adults: A scoping review  
10  
11  
12  
13  
14  
15

16 Corresponding author:

17 Mr Doug Cary

18 5 William Street, Esperance Western Australia 6450 Australia

19 dougcary@westnet.com.au

20 +61 890715055  
21  
22  
23  
24  
25  
26  
27  
28  
29

30 Co-authors:

31 A/Prof Kathy Briffa

32 School of Physiotherapy and Exercise Science, Faculty of Health, Curtin University,  
33 Kent St, Bentley WA 6102, Australia  
34  
35

36 Dr Leanda McKenna

37 School of Physiotherapy and Exercise Science, Faculty of Health, Curtin University,  
38 Kent St, Bentley WA 6102, Australia  
39  
40  
41  
42  
43  
44  
45  
46  
47  
48

49 **Word count:** 4010  
50  
51  
52

53 **General subject:** Research

54 **Subject headings:** Rehabilitative Medicine

55  
56 **Keywords:** sleep posture, sleep position, spinal symptoms, pain, stiffness, education  
57  
58  
59  
60

## Abstract

**Objectives:** The aims of this scoping review were to (a) determine the body of evidence regarding relationships between sleeping postures and spinal symptoms and (b) provide suggestions as to what sleeping postures can be recommended by clinicians.

**Design:** Scoping review.

**Data sources:** PEDro, Embase, Cumulative Index to Nursing and Allied Health Literature, Cochrane Library, Medline, ProQuest, PsycINFO, SportDISCUS and grey literature from inception to April 10, 2018.

**Data selection:** Using a modified Arksey and O'Malley framework, all English language studies in humans that met eligibility criteria using key search terms associated with sleep posture and spinal symptoms were included.

**Data extraction:** Data were independently extracted by 2 reviewers and mapped to describe the current state of the literature. Articles meeting the search criteria were critically appraised using the Downs and Black checklist.

**Results:** From 4186 articles, four articles were identified, of which three were exploratory and one interventional. All studies examined three or more sleep postures, all measured sleep posture using self-report and one study also used infrared cameras. Two studies examined symptoms arising from the lumbar spine, one the cervical spine, and one the whole spine. Waking pain and stiffness were the most common symptoms explored and side lying was generally protective against spinal symptoms.

**Conclusions:** This scoping review highlights the importance of evaluating sleep posture with respect to waking symptoms. Side lying appears protective of cervical symptoms and possibly spinal symptoms in general, however there is a general paucity of studies from which to draw firm conclusions for all sleep postures. It is recommended future research consider group sizes and population characteristics to achieve research goals, that a validated measure be used to assess sleep posture, that characteristics and location of spinal symptoms are clearly defined and that the side lying posture is subclassified.

## Strengths and Limitations of this Study

- This is the first scoping review collating and synthesising the available literature on sleeping posture and non-specific spinal symptoms
- A critical appraisal of evidence assessment was undertaken for each included study
- The lack of studies and small group sizes prevented firm recommendations being provided for all sleep posture

## Funding

Author (DC) acknowledges support from Australian Government Research Training Program Scholarship in supporting this research.

## Competing Interest

None declared.

## Data Sharing Statement

No additional data are available.

## Introduction

Cervical and lumbar symptoms are the leading cause of musculoskeletal disability in most countries and most age groups. Of those who report cervical and lumbar pain, the proportion is higher in females for both cervical (59%)(1) and lumbar (52%) pain(2). The prevalence of both cervical and lumbar pain has increased markedly over the past 25 years(cervical 21.1% and lumbar 17.3%), and these rates are expected to continue rising(3). Cervical and lumbar pain contribute to large economic and societal costs and are major sources of work disability, being either the first or second ranked cause of years lived with disability between the ages of 20 and 79 years(3-5). Research indicates that remissions in symptoms are temporary rather than permanent(6, 7) and cervical and lumbar pain becomes chronic in 25 to 60% of cases(8). Identification of modifiable risk factors contributing to the onset and chronicity of cervical and lumbar pain and other symptoms, is critical(9) to improve the management of cervical and lumbar pain.

A potentially modifiable risk factor that aggravates spinal symptoms, is sleep posture. Sleep is considered essential for human mental and physical recovery. Yet, every night some people go to bed, only to wake with spinal symptoms not present the prior evening, while others with existing spinal symptoms, wake with

1  
2  
3  
4 exacerbations of their symptoms(10, 11). For example, in young air force personnel,  
5 33% experienced their most intense spinal pain during the evening and on first  
6 waking(10). It has been postulated that poor sleep posture may be a factor in the  
7 development of both waking cervical(12-14) and lumbar symptoms(15, 16).  
8  
9

10  
11 Habitual sleep postures may influence the amount of load applied to spinal tissues  
12 when sleeping. When upright, compressive load due to gravity and muscle  
13 contraction(17, 18) is likely to be far less during the day than during sleep, creating a  
14 low compression environment. In a 25-year review on the fundamentals of spinal  
15 biomechanics, it was noted that spinal movements decrease under a superimposed  
16 compression load. The author postulated this was due to increased anular stiffness  
17 and increased zygapophyseal joint (ZPJ) contact(19). Conversely, when lying down,  
18 the sources of spinal compression are minimal, creating a low compression  
19 environment, potentially allowing an increased range of spinal movement. The  
20 combination of increased range and asymmetrical loading posture may result in  
21 altered and/or additional loading of viscoelastic collagenous restraints like the ZPJ  
22 capsule and ligaments(20). Viscoelastic tissues are vulnerable to sustained or  
23 repeated low elongation loads, and undergo predictable mechanical and viscoelastic  
24 changes. Ligaments in feline spines exposed to 60 minutes of repeated low load,  
25 demonstrate a significant increase in the expression of pro-inflammatory chemicals,  
26 compared with control ligaments from the same spine, indicating acute inflammation  
27 and tissue degradation in ligaments subjected to the cyclic loading(21). Additionally,  
28 sustained non-symmetrical sleep postures can induce structural spinal changes in  
29 humans(22, 23). Sleep postures have been shown to be modifiable(15, 24) and  
30 identification of modifiable risk factors related to spinal pain, have been highlighted  
31 as a priority in managing disabling lumbar pain(25).  
32  
33  
34  
35  
36  
37  
38  
39  
40  
41  
42  
43  
44  
45  
46  
47

48 Some sleep postures, such as prone, are clinically believed to increase load on  
49 spinal tissues, reducing recovery and provoking waking spinal symptoms(16, 26, 27).  
50 While some sleep research has examined the role sleep posture may have on spinal  
51 symptoms(11, 15, 28), there has been no synthesis of the literature in regards to  
52 sleep posture and spinal symptoms.  
53  
54  
55  
56  
57  
58  
59  
60

## Methods

### Search Framework

This scoping review was developed using the methodological framework proposed by previous authors(29), further refined by other independent authors and institutes(30-32) and reported in line with key PRISMA-ScR guidelines(33).

### *Research Question*

Following an individual review of the literature and a group meeting, an authors' consensus was reached to determine the following research question; is there a relationship between sleep posture and spinal symptoms?

### *Aim and Objectives*

The aim of this scoping review was to gain a clear understanding of the current knowledge base in relation to the identified research question. To achieve this aim, an iterative process involving electronic meetings and communication between authors was used to determine the following research objectives:

- Identify what study designs and participant populations have been studied to answer the research question.
- Identify the types of specific methodology used in the body of evidence to address the research question.
- Identify common results, conclusions and recommendations from the body of evidence regarding the research question.

### Eligibility Criteria

Eligibility criteria were based upon the population, intervention, comparison and outcome (PICO) framework. A draft list of eligibility criteria was initially determined following the independent screening of relevant articles by two reviewers. Criteria were then developed iteratively between two reviewers and a finalised list of criteria were uploaded to Covidence(34), as a reference for data charting reviewers.

### *Inclusion Criteria*

For inclusion in this scoping review, the prior research needed to study participants 18 years or older, with either pain, stiffness or bothersomeness in the cervical, thoracic or lumbar spine. Any observational or interventional study examining the

1  
2  
3  
4 relationship between sleep posture and spinal symptoms was considered. Articles  
5 that either compared sleep posture change (e.g., before and after an intervention) or  
6 had no comparator (e.g., epidemiological) were included. Articles needed to use a  
7 subjective or objective measure for symptoms and sleeping posture.  
8  
9

### 10 11 ***Exclusion Criteria*** 12

13  
14 Articles were excluded if they involved animals, cadavers or included participants  
15 diagnosed with sleep apnoea, spinal stenosis, migraine, red flag pathologies (e.g.,  
16 neoplasm, inflammatory conditions, fractures or infections); participants with pain of  
17 known non-spinal origin (e.g., kidney disease, post-operative pain,  
18 temporomandibular joint, shoulder pain); participants with neurological conditions  
19 (e.g., multiple sclerosis, cerebrovascular accident); or participants that were unable  
20 to move freely in bed (e.g., using continuous positive airway pressure therapy or in  
21 the last trimester of pregnancy). Articles were excluded if they did not isolate the  
22 intervention when a group of interventions were implemented (e.g., spinal injection  
23 and sleeping posture) or if they compared sleep systems (e.g., mattress, base and or  
24 pillow) or changes in sleep systems but did not report the change in sleep posture.  
25  
26 Further, articles using actigraphy to measure movement or articles that only  
27 examined the quality or efficacy of sleep were excluded. Finally, editorials, opinion-  
28 based articles, review articles (systematic or narrative) and articles not written in  
29 English were excluded.  
30  
31  
32  
33  
34  
35  
36  
37  
38  
39  
40

### 41 **Patient and Public Involvement** 42

43  
44 Patients and the public were not involved in this scoping review.  
45

### 46 **Search Terms and Strategy** 47

48  
49 The population, intervention, comparison and outcome (PICO) framework was used  
50 to assist in the collation of all elements relevant to clinical research questions.  
51  
52 Population: Terms used for the search strategy were chosen to be representative of  
53 the areas and symptoms, likely to be experienced by a population with non-specific  
54 spinal symptoms. Non-specific symptoms are those not related to fracture, infection,  
55 inflammatory disease, tumor or spinal stenosis. Intervention: Terms representative of  
56 interventions aimed at changing sleep posture in association with spinal symptoms  
57 were considered for inclusion, while other terms not associated with spinal  
58  
59  
60



1  
2  
3  
4 symptoms e.g. apnoea were excluded. Comparison: Terms were considered that  
5 were indicative of any type of comparison. Outcome: Any terms to indicate the  
6 subjective measure of pain, stiffness or bothersomeness or objective measure used  
7 to evaluate sleep posture, were considered.  
8  
9

10  
11 Identified key search terms were then used in the search strategy to identify all  
12 relevant articles. An initial search was conducted in two of the four databases,  
13 recommended(35) for physiotherapy related topics; PEDro, and Embase (via Ovid)  
14 from inception to December 2017. The initial search was used to determine if the  
15 search terms and strategy were appropriate, and informed the development of the  
16 final search terms and strategy.  
17  
18

19  
20 The final search strategy was conducted using the search terms and Boolean logic  
21 as described in [Supplementary File Search Strategy for the Scopus Database](#) and  
22 adapted for eight electronic databases (PEDro, Embase, Cumulative Index to  
23 Nursing and Allied Health Literature, Cochrane Library, Medline, ProQuest,  
24 PsycINFO, SportDISCUS) with the assistance of a health sciences information  
25 specialist. Grey literature (espace, Google Scholar (top 100 references scanned for  
26 relevance), and Web of Science) was searched for difficult to locate or unpublished  
27 material that had not already been included. The final step involved manual  
28 searching the reference sections of relevant articles and publications by key authors  
29 for additional articles, not identified in the original search.  
30  
31  
32  
33  
34  
35  
36  
37  
38  
39

## 40 Study Selection

41  
42 All search results were imported into the reference management software package,  
43 Endnote X8(36) and duplicates removed. Remaining results were imported into  
44 Covidence(34) and additional duplicates removed. Using Covidence, two reviewers  
45 independently performed Level 1 (title and abstract) and Level 2 (full text) screening,  
46 based on the eligibility criteria. Differences of opinion in which articles progressed to  
47 the next level, were first resolved with discussion between reviewers and if  
48 necessary, with input from a third reviewer.  
49  
50  
51  
52  
53  
54

## 55 Data Charting

56  
57 The data charting form was developed and revised iteratively between reviewers to  
58 ensure data relevant to the three research objectives were collected. A definitions  
59 and instructions document was developed to ensure that data was collected  
60

1  
2  
3  
4 consistently by the independent reviewers. The data charting form was then  
5 independently pilot tested in duplicate on a random sample of four potential articles.  
6 Following identification of articles for inclusion in this review, data were  
7 independently charted in duplicate using a data charting form created in Excel and  
8 based on the three research objectives. An attempt was made to contact authors of  
9 eligible articles where authors reported that data relevant to our scoping review had  
10 been collected but was not publicly available, and to clarify points relevant to our  
11 data charting.  
12  
13  
14  
15  
16  
17

## 18 **Quality of Evidence**

19  
20  
21 Non-assessment of methodological quality and the risk of bias is consistent with  
22 current guidelines on conducting a scoping review(30, 32). However, a focus of this  
23 scoping review was on methodology; therefore, a methodological assessment of  
24 quality was included. The Downs and Black checklist(37) was chosen, as it has  
25 documented criterion validity, face and content validity, intra-rater ( $r = .88$ ) and inter-  
26 rater reliability ( $r = .75$ ) and guidelines for use(38). A modified version of the Downs  
27 and Black checklist(39), where a dichotomous score for power (question 27) was  
28 used. As a result, the maximum score for randomised trials was 28 and non-  
29 randomised trials 25. The Downs and Black checklist was independently completed  
30 for each article in duplicate. Differences in scoring were first resolved by consensus  
31 between reviewers and if required, by a third independent reviewer. Study limitations  
32 noted by authors were collected to compliment the Downs and Black checklist.  
33  
34  
35  
36  
37  
38  
39  
40  
41  
42

## 43 **Results**

### 44 **Search Results**

45  
46  
47 An overview of the article identification process is provided in the PRISMA flow  
48 diagram in Figure 1. Articles excluded due to wrong outcomes, were those that did  
49 not include a measure of sleep posture or only examined sleep posture and not  
50 symptoms, tested a sleeping system (e.g., mattress or pillow) in relation to spinal  
51 symptoms but not posture, or studied sleep posture in relation to sleep quality.  
52 Articles excluded due to wrong study design included treatment guidelines, opinion  
53 and editorial piece and summaries.  
54  
55  
56  
57  
58  
59  
60

### **FIGURE 1 PRISMA FLOW DIAGRAM (SEPARATE FILE)**

1  
2  
3  
4  
5  
6  
7  
8  
9  
10  
11  
12  
13  
14  
15  
16  
17  
18  
19  
20  
21  
22  
23  
24  
25  
26  
27  
28  
29  
30  
31  
32  
33  
34  
35  
36  
37  
38  
39  
40  
41  
42  
43  
44  
45  
46  
47  
48  
49  
50  
51  
52  
53  
54  
55  
56  
57  
58  
59  
60

*Table 1. Mapping of Study Design and Population Characteristics*

| Author                           | Study Design     | Population Type                                                                                | Sample Size (Gender) | Age <i>M</i> ( <i>SD</i> ) |
|----------------------------------|------------------|------------------------------------------------------------------------------------------------|----------------------|----------------------------|
| Abanobi et al., 2015             | Case controlled  | Welders in Owerri, Nigeria                                                                     | 100 (male = 100)     | 35 (9)                     |
| Cary et al., 2016                | Cross sectional  | Population of convenience in Esperance, Western Australia                                      | 15 (male = 7)        | 44 (17)                    |
| Desouzart et al., 2016           | Controlled pilot | Elderly participants in physical activity program at Polytechnic Institute of Leiria, Portugal | 20 (male = 0)        | 62 (4)                     |
| Gordon, Grimmer and Trott, 2007a | Epidemiologic al | Every third household in Port Lincoln in South Australia                                       | 812 (male = 261)     | Female 61 (10)             |
| Gordon, Grimmer and Trott, 2007b |                  |                                                                                                |                      | Male 59 (11)               |

Notes. *M* = Mean, *SD* = Standard deviation

## Study Design and Population Characteristics

The designs of the four included studies were mixed (Table 1). One study included information that was presented in two separate articles(11, 40).

### *Methodology: Sleep Posture Measurement*

All studies examined participants in their domestic environment (Table 2) and described as a minimum the three common sleep postures; supine, side lying and prone. One study described four sleep postures, dividing side lying into two sleep postures and named them supportive side lying and  $\frac{3}{4}$  side lying(41). Another described five postures, adding “upright” and “varies”, to the common three sleep postures(11). One study used three different postures, but combined side lying and prone for analysis, due to small number of prone sleepers, of whom none reported lumbar pain(42). All studies used self-report questionnaires to assess sleep posture. Studies focused on different time points when questioning about sleep posture. Two specifically focused on night and waking posture; “in what sleep posture do you usually go to sleep”, “in what sleep posture do you usually wake up” and “in what sleep posture do you spend most of the night”(11)(p. 7), and “which posture most closely resembles the posture you are lying in when you fall asleep?” and “which posture most closely resembles the posture you are lying in when you wake

1  
2  
3  
4 up?”(41)(Appendix 1.). The other two studies were non-specific, “usual sleep  
5 posture”(42)(p. 335) and “informal questionnaire for ... sleeping position”(15)(p. 237).  
6  
7 In addition to using self-report, the authors of one study used an objective method of  
8  
9 assessment, twin camera infrared video recording, to verify sleep posture(41).  
10  
11  
12  
13  
14  
15  
16  
17  
18  
19  
20  
21  
22  
23  
24  
25  
26  
27  
28  
29  
30  
31  
32  
33  
34  
35  
36  
37  
38  
39  
40  
41  
42  
43  
44  
45  
46  
47  
48  
49  
50  
51  
52  
53  
54  
55  
56  
57  
58  
59  
60

For peer review only

Table 2. Mapping of Sleep Posture Measurement and Symptoms

| Author                          | Sleep Environment | Standard three sleep postures | Number of sleep postures | Sleep posture outcome measurement | Anatomical Area               | Symptom Type                                 | Symptom(s) Characteristics                 | Symptom Outcome Measurement                    |
|---------------------------------|-------------------|-------------------------------|--------------------------|-----------------------------------|-------------------------------|----------------------------------------------|--------------------------------------------|------------------------------------------------|
| Abanobi et al., 2015            | Domestic          | Y                             | 3                        | SR                                | Lumbar                        | Pain                                         | Past and present history                   | Questionnaire - face to face interview         |
| Cary et al., 2016               | Domestic          | Y                             | 4                        | SR + Video recording              | Cervical, Lumbar, Both, Other | Pain, Stiffness                              | Frequency (month) Waking symptoms          | Questionnaire written                          |
| Desouza et al., 2016            | Domestic          | Y                             | 3                        | SR                                | All spine                     | Pain                                         | Intensity                                  | Questionnaire written - pain VAS               |
| Gordon, Grimmer and Trott, 2007 | Domestic          | Y                             | 5                        | SR                                | Cervical                      | Pain, Stiffness, HA, Shoulder blade/arm pain | Frequency (week), duration Waking symptoms | Questionnaire - structured telephone interview |

Notes. NS = Not stated, Y = Yes, SR = Self-report, HA = Headache, VAS = Visual analogue scale

### 5 ***Methodology: Measurement of Symptoms***

6 The anatomical location, characteristics and method of measuring spinal symptoms  
7 are presented in Table 2. One study included non-spinal symptoms (e.g., hip and  
8 legs) classified as “other”(41). All studies examined pain (with two studies examining  
9 additional symptoms), but differed in regards to examining intensity, frequency,  
10 period of symptoms and diurnal/nocturnal presence. In one study, participants  
11 answered a “question on LBP history, such as present and past low back  
12 history”(42)(p. 333) and another asked participants “the frequency and location of  
13 morning symptoms of spine pain and stiffness that occurred during the past  
14 month”(41)(p. 2). In the other two studies, one described the frequency and duration  
15 of morning pain and stiffness over the prior week, but not intensity(11) while the  
16 other used a visual analogue scale (VAS) to measure pain intensity “at moment of  
17 response” but not frequency or duration(15)(p. 237).

### 18 ***Methodology: Interventions and Follow-ups***

19 Only participants in the treatment group of the intervention study(15) received sleep  
20 posture education. Those with dorsal or lumbar symptoms were advised to sleep  
21 supine, those with cervical symptoms were advised to sleep in side lying and prone  
22 sleepers were advised to adopt either of the prior recommended sleep postures.  
23 Participants were also educated about the use of pillows and how to get up and lie  
24 down. The control group received no instruction and neither group received further  
25 contact until reassessment. The intervention phase lasted 4 weeks. A significant  
26 reduction in pain was reported in the treatment group but not the control group.  
27 However, sleep posture was not objectively confirmed at baseline or after the  
28 intervention period.

### 29 ***Results, Conclusions and Recommendations***

30 Results from all studies reported trends or significant associations between spinal  
31 pain and certain sleep postures (Table 3). The authors from three studies reported  
32 increased symptoms, one associated with supine(42) one upright(11) and the other  
33 prone or  $\frac{3}{4}$  side lying(41) sleep postures. The authors from two studies reported  
34 significantly decreased symptoms, one with side lying(11) and the other a  
35 combination of side lying and supine(15). In the intervention study the authors  
36 reported ( $M$  = mean,  $SD$  = standard deviation) a significant reduction in pain VAS ( $M$

---

*Table 3 Mapping of Results, Conclusions and Recommendations*

37 = 3.00,  $SD = 1.63$ ,  $p = .009$ ) for the intervention group but not the control group ( $M =$   
38 3.90,  $SD = 3.21$ ,  $p = .472$ )(15). Between groups comparisons were not reported,  
39 possibly because it was a pilot study. We used an online calculator(43) to determine  
40 effect size and confidence intervals between groups, using baseline to post  
41 intervention data. Baseline to post intervention change was used because a  
42 significant difference between groups existed at baseline. This identified an overlap  
43 in effect size confidence intervals between groups, indicating a probable lack of  
44 significance between groups, based on the proportion of overlap in effect size  
45 confidence intervals(44).

46 Conclusions from authors of all four studies, were that sleep posture could increase  
47 or decrease spinal pain, and that addressing sleep posture could reduce the  
48 development of spinal pain. Using self-report, side lying was reported as protective  
49 of spinal symptoms(11, 15) and participants that slept in supported side lying were  
50 found to have less symptoms than those sleeping in  $\frac{3}{4}$  side lying or prone(41). In  
51 regards to supine, one study found supine increased the likelihood of lumbar pain by  
52 1.9 times(42), another study recommended supine in combination with side lying  
53 sleep postures to reduce lumbar pain(15) and a third reported supine was not  
54 significantly protective of cervical waking symptoms(11).

| Author                | Results                                                                                                                                                                                                                                   | Conclusions                                                                                                                                                                                                            | Recommendations                                                                                                                                                                                          |
|-----------------------|-------------------------------------------------------------------------------------------------------------------------------------------------------------------------------------------------------------------------------------------|------------------------------------------------------------------------------------------------------------------------------------------------------------------------------------------------------------------------|----------------------------------------------------------------------------------------------------------------------------------------------------------------------------------------------------------|
| Abanobi et al., 2015  | Prone and side lying groups combined. "Sleeping with back (face up) increases the risk of developing low back pain by 1.9 times." (p. 355) (95% CI 4.31-8.56) <sup>^^</sup> p = .31.                                                      | "The result showed the possibility of reducing the burden of LBP by appropriate training and improvement in habits such as...bad sleeping postures." (p. 336)                                                          | Not provided                                                                                                                                                                                             |
| Cary et al., 2016     | "The time spent in each of the sleeping postures ... expressed as a percentage of the time spent asleep, did not differ significantly according to the level of morning symptoms" (p. 5) Independent Samples Kruskal-Wallis Test p = .17. | "participants that spent greater periods of time in SSL, had less mornings of symptoms per month than those that slept in ¼ SL or prone." (p. 5)                                                                       | Not provided                                                                                                                                                                                             |
| Desouzar et al., 2016 | No between group comparison reported, unlikely to be significant. See text for more details.                                                                                                                                              | "It may be concluded that the indication of the ideal way to lie down, which corresponds to a recommended sleeping posture with the ideal position to place the pillows, as well as the ideal way to get up." (p. 239) | Ideal sleep posture, pillow use and way to get up, as per experimental group, "is an added value for the prevention and decrease of the pain and/or discomfort in the spine in active seniors." (p. 239) |



|    |              |                                                              |
|----|--------------|--------------------------------------------------------------|
| 1  |              |                                                              |
| 2  |              |                                                              |
| 3  |              |                                                              |
| 4  | Gordon,      | “Subjects who reported sleeping mostly in an upright         |
| 5  | Grimmer and  | position were significantly more likely to report all waking |
| 6  | Trott, 2007a | symptoms but this finding may be related to the medical      |
| 7  |              | status of those who adopt this sleep position.” (p. 6)       |
| 8  | Gordon,      |                                                              |
| 9  | Grimmer and  | Waking cervical pain OR 2.5 (95% CI 1.1-5.5), cervical       |
| 10 | Trott, 2007b | stiffness OR 2.6 (95% CI 1.1-5.8), headache OR 2.2           |
| 11 |              | (95% CI 1.0-5.0), scapular/arm pain OR 2.5 (95% CI 1.1-      |
| 12 |              | 5.3).                                                        |
| 13 |              | “Supine...was not found in this study to be significantly    |
| 14 |              | protective of waking symptoms, when compared to other        |
| 15 |              | sleep positions.” (p. 6) Waking cervical pain OR 1.4 (95%    |
| 16 |              | CI 0.8-2.5) and cervical stiffness OR 0.9 (95% CI 0.5-1.6).  |
| 17 |              | “Prone...was not significantly associated with waking        |
| 18 |              | symptom” (p. 6) Cervical pain OR 1.5 (95% CI 0.7-3.2)        |
| 19 |              | and cervical stiffness OR 1.1 (95% CI 0.5-2.6).              |
| 20 |              | “Side sleep position was significantly protective of waking  |
| 21 |              | cervical and scapular/arm pain” (p. 6) Waking cervical       |
| 22 |              | pain OR 0.6 (95% CI 0.4-0.9) and scapular/arm pain OR        |
| 23 |              | 0.7 (95% CI 0.5-0.9).                                        |
| 24 |              |                                                              |
| 25 |              |                                                              |
| 26 |              |                                                              |
| 27 |              |                                                              |
| 28 |              |                                                              |
| 29 |              |                                                              |
| 30 |              |                                                              |
| 31 |              |                                                              |
| 32 |              |                                                              |
| 33 |              |                                                              |
| 34 |              |                                                              |
| 35 |              |                                                              |
| 36 |              |                                                              |
| 37 |              |                                                              |
| 38 |              |                                                              |
| 39 |              |                                                              |
| 40 |              |                                                              |
| 41 |              |                                                              |
| 42 |              |                                                              |
| 43 |              |                                                              |
| 44 |              |                                                              |
| 45 |              |                                                              |
| 46 |              |                                                              |
| 47 |              |                                                              |
| 48 |              |                                                              |
| 49 |              |                                                              |
| 50 |              |                                                              |
| 51 |              |                                                              |
| 52 |              |                                                              |
| 53 |              |                                                              |
| 54 |              |                                                              |
| 55 |              |                                                              |
| 56 |              |                                                              |
| 57 |              |                                                              |
| 58 |              |                                                              |
| 59 |              |                                                              |
| 60 |              |                                                              |
| 61 |              |                                                              |
| 62 |              |                                                              |
| 63 |              |                                                              |
| 64 |              |                                                              |
| 65 |              |                                                              |
| 66 |              |                                                              |
| 67 |              |                                                              |
| 68 |              |                                                              |
| 69 |              |                                                              |
| 70 |              |                                                              |

Notes. LBP = Low back pain, SSL = Supported side lying, ¼ SL = ¼ side lying, VAS = Visual analogue scale, OR = Odds ratio, CI = Confidence interval

^^ The CI was recalculated as it was suspected wrong due a typographical error. The recalculated value was 0.431

55

56 Two studies recommended clinicians consider sleep posture to reduce cervical(11)  
57 and lumbar symptoms(15).

### 58 *Quality of Evidence and Author Reported Limitations*

59 The quality of evidence is summarised in Table 4. The Downs and Black checklist  
60 contains 27 questions distributed over five domains; reporting (aims, sampling and  
61 methods); external validity (generalisability); internal validity (study design, selection  
62 bias, performance and reporting bias); confounding; and power (37). Using the  
63 Downs and Black checklist as the appraisal tool, evidence levels have previously  
64 been categorised as strong (> 75%), moderate (50 - 74%), limited (25 – 49%) and  
65 poor quality (< 24%)(45). Questions 4, 8, 9, 13, 14, 15, 19, 23, 24, and 26 (see Table  
66 4 for details) were not applicable to study designs that did not include an intervention  
67 group and were therefore excluded from the three exploratory studies(11, 41, 42).  
68 Question 27 was applicable for all but the cross sectional study(41). In the reporting  
69 subsection, questions one to 10, studies were well documented with one different  
70 applicable question not completed by each study, enabling readers to draw unbiased

1  
2  
3  
4 71 assessments of each study's findings. Questions 11 to 13 (external validity), were  
5 72 poorly reported, with all studies failing to quantify the proportion of participants that  
6 73 were asked, relative to the proportion of participants that were accepted into studies.  
7 74 All studies reported using either random(11, 15, 42) or consecutive sampling(41).  
8 75 Internal validity, questions 14 to 20, examined measurement bias and apart from  
9 76 question 15 were well documented. In all studies, no attempt was made to blind  
10 77 researchers measuring the outcome variables. However, in one exploratory study  
11 78 the interview method precluded the need for blinding of interviewers(11). All the  
12 79 remaining questions were well documented, except for question 25 which examined  
13 80 confounding factors. This was poorly documented except for one study(40), in which  
14 81 a multivariate analysis was reported in a subsequent study, using the same data.  
15 82 The body of evidence in this scoping review is rated as moderate to strong quality.  
16  
17  
18  
19  
20  
21  
22  
23  
24  
25  
26  
27  
28  
29  
30  
31  
32  
33  
34  
35  
36  
37  
38  
39  
40  
41  
42  
43  
44  
45  
46  
47  
48  
49  
50  
51  
52  
53  
54  
55  
56  
57  
58  
59  
60

1  
2  
3  
4  
5  
6  
7  
8  
9  
10  
11  
12  
13  
14  
15  
16  
17  
18  
19  
20  
21  
22  
23  
24  
25  
26  
27  
28  
29  
30  
31  
32  
33  
34  
35  
36  
37  
38  
39  
40  
41  
42  
43  
44  
45  
46

*Table 4 Critical Appraisal of Included Studies Using the Downs and Black Checklist*

| Section           | Questions                                                                                                                                                    | Abanobi et al., 2015 | Cary et al., 2016 | Desouzart et al., 2016 | Gordon, Grimmer and Trott, 2007 |
|-------------------|--------------------------------------------------------------------------------------------------------------------------------------------------------------|----------------------|-------------------|------------------------|---------------------------------|
| Reporting         | 1 Is the hypothesis/aim/objective of the study clearly described?                                                                                            | Y                    | Y                 | Y                      | Y                               |
|                   | 2 Are the main outcomes to be measured clearly described in the Introduction or Methods section?                                                             | N                    | Y                 | Y                      | Y                               |
|                   | 3 Are the characteristics of the patients included in the study clearly described?                                                                           | Y                    | N                 | Y                      | X                               |
|                   | 4 Are the interventions of interest clearly described?                                                                                                       | X                    | X                 | Y                      | X                               |
|                   | 5 Are the distributions of principal confounders in each group of subjects to be compared clearly described?                                                 | *Y                   | X                 | *Y                     | *Y                              |
|                   | 6 Are the main findings of the study clearly described?                                                                                                      | Y                    | Y                 | Y                      | Y                               |
|                   | 7 Does the study provide estimates of the random variability in the data for the main outcomes?                                                              | Y                    | Y                 | Y                      | Y                               |
|                   | 8 Have all important adverse events that may be a consequence of the intervention been reported?                                                             | X                    | X                 | N                      | X                               |
|                   | 9 Have the characteristics of patients lost to follow-up been described?                                                                                     | X                    | X                 | Y                      | X                               |
|                   | 10 Have actual probability values been reported (e.g., 0.035 rather than <0.05) for the main outcomes except where the probability value is less than 0.001? | Y                    | Y                 | Y                      | N                               |
| External Validity | 1 Were the subjects asked to participate in the study representative of the entire population from which they were recruited?                                | Y                    | Y                 | N                      | Y                               |
|                   | 2 Were those subjects who were prepared to participate representative of the entire population from which they were recruited?                               | U                    | N                 | N                      | N                               |

|                                   |        |                                                                                                                                                                                                                           |   |   |   |   |
|-----------------------------------|--------|---------------------------------------------------------------------------------------------------------------------------------------------------------------------------------------------------------------------------|---|---|---|---|
|                                   | 1<br>3 | Were the staff, places, and facilities where the patients were treated, representative of the treatment the majority of patients receive?                                                                                 | X | X | Y | X |
| Internal Validity:<br>Bias        | 1<br>4 | Was an attempt made to blind study subjects to the intervention they have received?                                                                                                                                       | X | X | U | X |
|                                   | 1<br>5 | Was an attempt made to blind those measuring the main outcomes of the intervention?                                                                                                                                       | X | X | N | X |
|                                   | 1<br>6 | If any of the results of the study were based on "data dredging", was this made clear?                                                                                                                                    | Y | Y | Y | Y |
|                                   | 1<br>7 | In trials and cohort studies, do the analyses adjust for different lengths of follow-up of patients, or in case-control studies, is the time period between the intervention and outcome the same for cases and controls? | Y | X | Y | X |
|                                   | 1<br>8 | Were the statistical tests used to assess the main outcomes appropriate?                                                                                                                                                  | Y | Y | Y | Y |
|                                   | 1<br>9 | Was compliance with the intervention/s reliable?                                                                                                                                                                          | X | X | U | X |
|                                   | 2<br>0 | Were the main outcome measures used accurate (valid and reliable)?                                                                                                                                                        | Y | Y | Y | Y |
| Internal Validity:<br>Confounding | 2<br>1 | Were the patients in different intervention groups (trials and cohort studies) or were the cases and controls (case-control studies) recruited from the same population?                                                  | Y | X | Y | Y |
|                                   | 2<br>2 | Were study subjects in different intervention groups (trials and cohort studies) or were the cases and controls (case-control studies) recruited over the same period of time?                                            | Y | X | Y | X |
|                                   | 2<br>3 | Were study subjects randomised to intervention groups?                                                                                                                                                                    | X | X | Y | X |
|                                   | 2<br>4 | Was the randomised intervention assignment concealed from both patients and health care staff until recruitment was complete and irrevocable?                                                                             | X | X | U | X |

1  
2  
3  
4  
5  
6  
7  
8  
9  
10  
11  
12  
13  
14  
15  
16  
17  
18  
19  
20  
21  
22  
23  
24  
25  
26  
27  
28  
29  
30  
31  
32  
33  
34  
35  
36  
37  
38  
39  
40  
41  
42  
43  
44  
45  
46

|                                                                                                                                         |        |                                                                                                                                                               |       |      |       |       |
|-----------------------------------------------------------------------------------------------------------------------------------------|--------|---------------------------------------------------------------------------------------------------------------------------------------------------------------|-------|------|-------|-------|
|                                                                                                                                         | 2<br>5 | Was there adequate adjustment for confounding in the analyses from which the main findings were drawn?                                                        | N     | N    | N     | Y     |
|                                                                                                                                         | 2<br>6 | Were losses of patients to follow-up taken into account?                                                                                                      | X     | X    | Y     | X     |
| Power                                                                                                                                   | 2<br>7 | Did the study have sufficient power to detect a clinically important effect where the probability value for a difference being due to chance is less than 5%? | N     | X    | N     | N     |
| Score                                                                                                                                   |        |                                                                                                                                                               | 14/17 | 9/12 | 19/28 | 12/14 |
| Percentage                                                                                                                              |        |                                                                                                                                                               | 82    | 75   | 68    | 86    |
| <i>Notes.</i> N = No = 0, Y = Yes = 1, *Y = 2 points, U = Unable to determine = 0, X = Not applicable (see Quality of Evidence section) |        |                                                                                                                                                               |       |      |       |       |

84  
85  
86  
87  
88

1  
2  
3  
4 Authors identified reliance on self-report to examine sleep posture(15) and  
5 symptoms(40) as a limitation. Authors identified small sample sizes, as limiting their  
6 ability to draw firm conclusions from the obtained results(11, 15). Authors identified  
7 restricted time as a limitation, for the period available for data collection(42), and for  
8 participants to learn a new sleeping habit(15). Limitations as reported by authors are  
9 described in [Supplementary File Author Reported Limitations](#).  
10  
11  
12  
13

## 14 Discussion

15  
16  
17 To our knowledge, this scoping review is the first to establish the body of evidence  
18 regarding the research question; relationships between sleeping posture and spinal  
19 symptoms. Generally, there was limited available research. In regards to Objective 1;  
20 research designs and populations studied for the research question, a variety of  
21 study designs, participant populations and sample sizes were used. One study was a  
22 controlled pilot trial. With regards to Objective 2; methods used to address the  
23 research question, sleep was assessed in a domestic environment in all studies, with  
24 self-report used to measure sleep posture in all studies. Pain was the most common  
25 outcome measure of symptoms. In respect to Objective 3; common conclusions  
26 regarding the research question, most authors recommended side lying as the sleep  
27 posture least likely to provoke spinal symptoms, be they cervical or lumbar. Studies  
28 included in this scoping review were of moderate quality as assessed using the  
29 Downs and Black critical appraisal tool.  
30  
31  
32  
33  
34  
35  
36  
37  
38  
39

40 The study designs identified in this scoping review were appropriate to use for the  
41 research question. The variety of study designs prevented data pooling and a  
42 scoping review remained the most appropriate approach to synthesise the research.  
43 The average age and gender ratios used in studies were representative of both  
44 cervical and lumbar pain populations, however, the results of the included studies  
45 need to be interpreted with caution. There was a strong gender bias in two  
46 studies(15, 42), and a restricted age of included participants in one study(15). In  
47 general, small sample sizes were used. The type of study designs and patient  
48 populations identified in this scoping review have provided preliminary information  
49 regarding relationships between sleep posture and spinal symptoms, but there were  
50 not enough studies to adequately answer our research question.  
51  
52  
53  
54  
55  
56  
57  
58  
59  
60

1  
2  
3  
4 The most common adult sleep postures are side lying, supine and prone (26, 46,  
5 47), which were the postures examined by the studies in this review. Side lying is the  
6 sleep posture that greater than 60% of European adults adopt for the majority of the  
7 night(26, 46, 47). For this reason, one study divided side lying into two sleep  
8 postures, based upon symmetry and plausible spinal load. These authors identified a  
9 trend that participants spending more time in symmetrical side lying reported less  
10 morning symptoms than those in asymmetrical side lying(41). Although all studies in  
11 this review utilised self-report to report sleep posture, some authors identified this as  
12 a limitation (11, 15, 41) and inaccuracy associated with sleep posture self-report can  
13 be as high as 33% (48, 49). It therefore seems prudent to not rely purely on self-  
14 report and clinicians would have higher confidence when advising people with pain  
15 about sleep posture, if research included both self-report and a valid and reliable  
16 measure of sleep posture, such as included in one study(41).

17  
18  
19  
20  
21  
22  
23  
24  
25  
26  
27 The anatomical features of the cervical and lumbar spine are different and it is  
28 plausible that sleeping postures could affect each area differently. For example,  
29 studies in this review indicated sleeping in supine was associated with lumbar  
30 symptoms(42), but not associated with cervical symptoms(11). Pain was measured  
31 in all studies, which is appropriate given cervical and lumbar pain are leading  
32 contributors across all age groups and countries to musculoskeletal disability(3).  
33 However, characteristics like intensity, frequency or the onset time of pain were not  
34 consistently measured and are important to better understand the overall impact pain  
35 is having on daily function(50). With regards to the relationship between sleep  
36 posture and time of onset of spinal symptoms, only half of the studies examined  
37 waking symptoms(11, 41). Waking spinal symptoms are rarely present every  
38 morning, which may be due to an individual's variation in sleep posture routine.  
39 Therefore, to better understand relationships between sleep posture and spinal  
40 symptoms, it would be important that spinal symptoms are recorded on first waking  
41 and over several days.

42  
43  
44  
45  
46  
47  
48  
49  
50  
51  
52  
53 Spinal pain is a major and growing global health problem with increasing rates of  
54 disability(3). For the past 20 years there has been a strong biomedical focus on  
55 patho-anatomy as the cause of spinal pain. However, in the case of lumbar pain,  
56 only 8-15% of cases has a specific tissue identified as the cause(51). Concurrently,  
57 there has been an escalation in imaging, opioid prescription, injections and surgery,  
58 with questionable benefit(52-54) and higher risks(8, 55). Changing physical risk  
59  
60

1  
2  
3 factors like type of movement pattern(56), level of strength and conditioning(57, 58)  
4 and sustained or repeated postures(59, 60) , are relatively risk free, cost effective  
5 and show great potential. Sleep posture is an example of a sustained physical risk  
6 factor that is modifiable(61, 62). Clinical recommendations from this review include  
7 considering sleep posture when developing management plans for people with  
8 waking spinal symptoms(11) and education to change symptomatic sleep postures  
9 (42). With regards to recommending a sleep posture to minimise spinal symptoms,  
10 this review finds that the side lying posture was the most consistent in protecting the  
11 cervical spine(11), and that side lying and supine were the sleep postures  
12 recommended for those with lumbar spinal pain(15).  
13  
14  
15  
16  
17  
18  
19  
20

21 It is recommended that future research uses group sizes large enough to achieve  
22 statistical goals and that study sample demographics are representative of those in  
23 the general population with cervical and lumbar pain. As side lying appears to be  
24 associated with less cervical and possibly spinal symptoms generally, it would be  
25 worthwhile further exploring whether subtypes of side lying postures are more  
26 appropriate than others. Further research should use a validated measure of sleep  
27 posture. To better understand the effect of sleep posture on spinal symptoms,  
28 symptom location, a variety of outcome measures with associated characteristics  
29 should be included and an emphasis is placed on symptom timing (e.g., first thing in  
30 the morning). Sleep posture is potentially modifiable following education(15).  
31 Education is a non-invasive and low-cost intervention and should be further explored  
32 with larger scale studies.  
33  
34  
35  
36  
37  
38  
39  
40  
41  
42

### 43 **Author Contributors**

44  
45 DC, LM and KB designed the study. DC and LM collected data and conducted data  
46 analysis. DC wrote the manuscript. DC, and LM undertook interpretation of findings  
47 and were involved in drafting the manuscript and revising it critically. All authors gave  
48 final approval to this manuscript.  
49  
50  
51  
52  
53  
54  
55  
56  
57  
58  
59  
60



## References

- 1 Côté P, Cassidy J, Carroll L, et al. The annual incidence and course of neck pain in the general population: A population-based cohort study. *Pain* 2004;112:267-73. doi:10.1016/j.pain.2004.09.004
- 2 Hoy D, Bain C, Williams G, et al. A systematic review of the global prevalence of low back pain. *Arthritis & Rheumatology* 2012;64:2028-37. doi:10.1002/art.34347
- 3 Hurwitz E, Randhawa K, Yu H, et al. The Global Spine Care Initiative: A summary of the global burden of low back and neck pain studies. *European Spine Journal* 2018:1-6. doi:org/10.1007/s00586-017-5432-9
- 4 Ekman M, Johnell O, Lidgren L. The economic cost of low back pain in sweden in 2001. *Acta Orthopaedica* 2005;76:275-84. doi:10.1080/00016470510030698
- 5 Wasiak R, Kim J, Pransky G. Work disability and costs caused by recurrence of low back pain: Longer and more costly than in first episodes. *Spine* 2006;31:219-25. doi:10.1097/01.brs.0000194774.85971.df
- 6 Croft P, Lewis M, Papageorgiou A, et al. Risk factors for neck pain: A longitudinal study in the general population. *Pain* 2001;93:317-25. doi:10.1016/S0304-3959(01)00334-7
- 7 Hestbaek L, Leboeuf-Yde C, Kyvik K, et al. The course of low back pain from adolescence to adulthood: Eight-year follow-up of 9600 twins. *Spine* 2006;31:468-72. doi:10.1097/01.brs.0000199958.04073.d9
- 8 Manchikanti L, Singh V, Datta S, et al. Comprehensive review of epidemiology, scope, and impact of spinal pain. *Pain Physician* 2009;12:35-70.
- 9 Croft P, Dunn K, Raspe H. Course and prognosis of back pain in primary care: The epidemiological perspective. *Pain* 2006;122:1-3. doi:10.1016/j.pain.2006.01.023
- 10 Desouzart G, Vilar E, Melo F, et al., editors. Human bed interaction: A methodology and tool to measure postural behavior during sleep of the air force military. 3rd International Conference on Design, User Experience, and Usability; 2014 June; Heraklion, Greece.
- 11 Gordon S, Grimmer K, Trott P. Sleep position, age, gender, sleep quality and waking cervico-thoracic symptoms. *Internet Journal of Allied Health Sciences and Practice* 2007;5.
- 12 Corrigan B, March L. Cervical spine dysfunction: A pain in the neck. *Patient Management* 1984;8:48-53.
- 13 Gordon S, Trott P, Grimmer K. Waking cervical pain and stiffness, headache, scapular or arm pain: Gender and age effects. *Australian Journal of Physiotherapy* 2002;48. doi:10.1016/S0004-9514(14)60277-4
- 14 McKenzie R. The cervical and thoracic spine: Mechanical diagnosis and therapy. Waikanae: Spinal Publications; 1990.
- 15 Desouzart G, Matos R, Melo F, et al. Effects of sleeping position on back pain in physically active seniors: A controlled pilot study. *Work* 2016;53:235-40. doi:10.3233/WOR-152243
- 16 Gracovetsky S. The resting spine: A conceptual approach to the avoidance of spinal reinjury during rest. *Physical Therapy* 1987;67:549-53.
- 17 Dolan P, Earley M, Adams M. Bending and compressive stresses acting on the lumbar spine during lifting activities. *Journal of Biomechanics* 1994;27:1237-48. doi:10.1016/0021-9290(94)90277-1
- 18 Kingma I, Baten C, Dolan P, et al. Lumbar loading during lifting: A comparative study of three measurement techniques. *Journal of Electromyography and Kinesiology* 2001;11:337-45. doi:10.1016/0021-9290(94)90277-1
- 19 Oxland T. Fundamental biomechanics of the spine: What we have learned in the past 25 years and future directions. *Journal of Biomechanics* 2016;49:817-32. doi:10.1016/j.jbiomech.2015.10.035
- 20 Adams M, Hutton W. The relevance of torsion to the mechanical derangement of the lumbar spine. *Spine* 1981;6:241-8.
- 21 Solomonow M. Neuromuscular manifestations of viscoelastic tissue degradation following high and low risk repetitive lumbar flexion. *Journal of Electromyography and Kinesiology* 2012;22:155-75. doi:10.1016/j.jelekin.2011.11.008

- 1  
2  
3 22 Hill S, Goldsmith J. Biomechanics and prevention of body shape distortion. *Tizard Learning*  
4 *Disability Review* 2010;15:15-32. doi:10.5042/tldr.2010.0166
- 5 23 Waugh A, Hill S. Body shape distortion: Promoting postural care at night. *Learning Disability*  
6 *Practice* 2009;12:25-9.
- 7 24 Murayama R, Kubota T, Kogure T, et al. The effects of instruction regarding sleep posture on the  
8 postural changes and sleep quality among middle-aged and elderly men: A preliminary study.  
9 *Bioscience Trends* 2011;5:111-9. doi:10.5582/bst.2011.v5.3.111
- 10 25 Buchbinder R, Tulder M, Öberg B, et al. Low back pain: A call for action. *The Lancet*  
11 2018;391:2384-8. doi:10.1016/S0140-6736(18)30488-4
- 12 26 De Koninck J, Lorrain D, Gagnon P. Sleep positions and position shifts in five age groups: An  
13 ontogenetic picture. *Sleep* 1992;15:143-9. doi:10.1093/sleep/15.2.143
- 14 27 Goldman S. Nocturnal neuropathic pain in diabetic patients may be caused by spinal stenosis.  
15 *Diabet Medicine* 2005;22:1763-5. doi:10.1111/j.1464-5491.2005.01746.x
- 16 28 Desouzart G, Filgueiras E, Melo F, et al., editors. Human body-sleep system interaction in  
17 residence for university students: Evaluation of interaction patterns using a system to capture video  
18 and software with observation of postural behaviors during sleep. 5th International Conference on  
19 Applied Human Factors and Ergonomics; 2014 July; Kraków, Poland.
- 20 29 Arksey H, O'Malley L. Scoping studies: Towards a methodological framework. *International*  
21 *Journal of Social Research Methodology* 2005;8:19-32. doi:10.1080/1364557032000119616
- 22 30 Khalil H, Peters M, Godfrey C, et al. An evidence-based approach to scoping reviews. *Worldviews*  
23 *on Evidence-Based Nursing* 2016;13:118-23. doi:10.1111/wvn.12144
- 24 31 Levac D, Colquhoun H, O'Brien K. Scoping studies: Advancing the methodology. *Implementation*  
25 *Science* 2010;5:9. doi:10.1186/1748-5908-5-69
- 26 32 Peters M, Godfrey C, Khalil H, et al. Guidance for conducting systematic scoping reviews.  
27 *International Journal of Evidence Based Healthcare* 2015;13:141-6.  
28 doi:10.1097/XEB.0000000000000050
- 29 33 Tricco A, Lillie E, Zarin W, et al. PRISMA extension for scoping reviews (PRISMA-ScR): Checklist and  
30 explanation. *Annals of Internal Medicine* 2018. doi:10.7326/M18-0850
- 31 34 Covidence. Melbourne Australia: Veritas Health Innovation; 2018.
- 32 35 Michaleff Z, Costa L, Moseley A, et al. CENTRAL, PEDro, PubMed, and EMBASE are the most  
33 comprehensive databases indexing randomized controlled trials of physical therapy interventions.  
34 *Physical Therapy* 2011;91:190-7. doi:10.2522/ptj.20100116
- 35 36 EndNote. X8 ed. Philadelphia USA: Clarivate Analytics; 2018.
- 36 37 Downs S, Black N. The feasibility of creating a checklist for the assessment of the methodological  
37 quality both of randomised and non-randomised studies of health care interventions. *Journal of*  
38 *Epidemiology & Community Health* 1998;52:377-84. doi:10.1136/jech.52.6.377
- 39 38 Olivo S, Macedo L, Gadotti I, et al. Scales to assess the quality of randomized controlled trials: A  
40 systematic review. *Physical Therapy* 2008;88:156-75. doi:10.2522/ptj.20070147
- 41 39 Korakakis V, Whiteley R, Tzavara A, et al. The effectiveness of extracorporeal shockwave therapy  
42 in common lower limb conditions: A systematic review including quantification of patient-rated pain  
43 reduction. *British Journal of Sports Medicine* 2018;52:387-407. doi:10.1136/bjsports-2016-097347
- 44 40 Gordon S, Grimmer K, Trott P. Understanding sleep quality and waking cervico-thoracic  
45 symptoms. *Internet Journal of Allied Health Sciences and Practice* 2007;5:1-12.
- 46 41 Cary D, Collinson R, Sterling M, et al. Examining the relationship between sleep posture and  
47 morning spinal symptoms in the habitual environment using infrared cameras. *Journal of Sleep*  
48 *Disorders: Treatment and Care* 2016;5. doi:10.4172/2325-9639.1000173
- 49 42 Abanobi O, Ayeni G, Ezeugwu C, et al. Risk-disposing habits of lowback pain amongst welders and  
50 panel beaters in Owerri, south-east Nigeria. *Indian Journal of Public Health* 2015;6:332-7.  
51 doi:10.5958/0976-5506.2015.00164.3
- 52 43 Monitoring CfEa. Effect Size Calculator 2018 [Available from: <https://www.cem.org/effect-size-calculator>].
- 53 44 Cumming G, Finch S. Inference by eye: Confidence intervals and how to read pictures of data.  
54 *American Psychologist* 2005;60:170-80.

- 1  
2  
3 45 Hignett S. Intervention strategies to reduce musculoskeletal injuries associated with handling  
4 patients: A systematic review. *Occupational Environmental Medicine* 2003;60:e6-e.  
5 doi:0.1136/oem.60.9.e6  
6  
7 46 Haex B. Back and bed: Ergonomic aspects of sleeping: Boca Raton: CRC Press; 2005.  
8 47 Gordon S, Grimmer K, Trott P. Self reported versus recorded sleep position: An observational  
9 study. *The Internet Journal of Allied Health Science and Practice* 2004;2:1-10.  
10 48 Yu C. Why is self-report of sleep position sometimes unreliable? *Sleep and Hypnosis* 2018;20:105-  
11 13. doi:10.5350/Sleep.Hypn.2017.19.0140  
12 49 Kaplowitz K, Blizzard S, Blizzard D, et al. Time Spent in Lateral Sleep Position and Asymmetry in  
13 Glaucoma. *Investigative Ophthalmology & Visual Science* 2015;56:3869-74. doi:10.1167/iovs.14-  
14 16079  
15 50 Gordon S, Grimmer-Somers K. Your pillow may not guarantee a good night's sleep or symptom-  
16 free waking. *Physiotherapy Canada* 2010;63:183-90. doi:10.3138/ptc.2010-13  
17 51 Waddell G. The back pain revolution. 2 ed. Edinburgh: Churchill Livingstone; 2004.  
18 52 Atlas S, Keller R, Wu Y, et al. Long-term outcomes of surgical and nonsurgical management of  
19 sciatica secondary to a lumbar disc herniation: 10 year results from the Maine Lumbar Spine Study.  
20 *Spine* 2005;30:927-35. doi:10.1097/01.brs.0000158954.68522.2a  
21 53 Friedly J, Chan L, Deyo R. Increases in lumbosacral injections in the Medicare population: 1994 to  
22 2001. *Spine* 2007;32:1754-60. doi:10.1097/BRS.0b013e3180b9f96e  
23 54 Runciman W, Hunt T, Hannaford N, et al. CareTrack: Assessing the appropriateness of health care  
24 delivery in Australia. *Medical Journal of Australia* 2012;197:100-5. doi:10.5694/mja12.10510  
25 55 Luo X, Pietrobon R, Hey L. Patterns and trends in opioid use among individuals with back pain in  
26 the United States. *Spine* 2004;29:884-90.  
27 56 O'Sullivan P. Diagnosis and classification of chronic low back pain disorders: Maladaptive  
28 movement and motor control impairments as underlying mechanism. *Manual Therapy* 2005;10:242-  
29 55. doi:10.1016/j.math.2005.07.001  
30 57 Gabel C, Mokhtarinia H, Hoffman J, et al. Does the performance of five back-associated exercises  
31 relate to the presence of low back pain? A cross-sectional observational investigation in regional  
32 Australian council workers. *BMJ open* 2018;8:e020946. doi:10.1136/bmjopen-2017-020946  
33 58 Micheo W, Baerga L, Miranda G. Basic principles regarding strength, flexibility, and stability  
34 exercises. *PM&R* 2012;4:805-11. doi:10.1016/j.pmrj.2012.09.583  
35 59 Solomonow M, Baratta R, Banks A, et al. Flexion relaxation response to static lumbar flexion in  
36 males and females. *Clinical Biomechanics* 2003;18:273-9. doi:10.1016/S0268-0033(03)00024-X  
37 60 Solomonow M, Zhou B, Lu Y, et al. Acute repetitive lumbar syndrome: A multi-component insight  
38 into the disorder. *Journal of Bodywork and Movement Therapies* 2012;16:134-47.  
39 doi:10.1016/j.jbmt.2011.08.005  
40 61 Cartwright R, Ristanovic R, Diaz F, et al. A comparative study of treatments for positional sleep  
41 apnea. *Sleep* 1991;14:546-52.  
42 62 van Maanen J, de Vries N. Long-term effectiveness and compliance of positional therapy with the  
43 sleep position trainer in the treatment of positional obstructive sleep apnea syndrome. *Sleep*  
44 2014;37:1209-15. doi:10.5665/sleep.3840  
45  
46  
47  
48  
49  
50  
51  
52  
53  
54  
55  
56  
57  
58  
59  
60

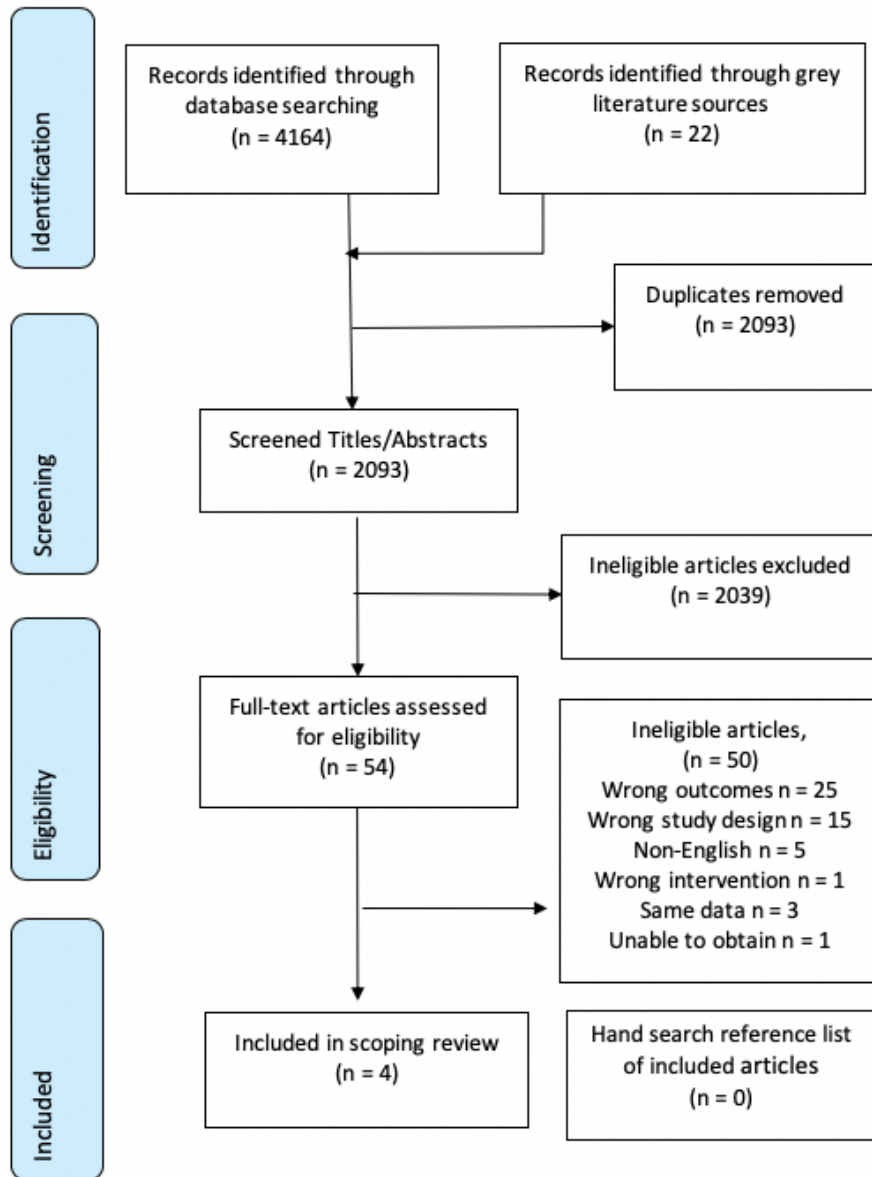

PRISMA Flow diagram

## Supplementary File: Search Strategy for Scopus Database

---

### *Search Strategy for the Scopus Database (adapted for other databases)*

---

|                 |                         |                                                                                                 |
|-----------------|-------------------------|-------------------------------------------------------------------------------------------------|
| <b>Date</b>     | 7/4/2018                |                                                                                                 |
| <b>Strategy</b> | #1 AND #2 AND #3 NOT #4 |                                                                                                 |
| <b>Rule</b>     | Domain                  | Search Terms                                                                                    |
| <b>#1</b>       | Area of symptoms        | lumbar or "low back pain" or cervical or "neck pain" or "musculoskeletal pain" or "spinal pain" |
| <b>#2</b>       | Posture                 | postur* or position* or prone or supine or lateral or side lying                                |
| <b>#3</b>       | Sleep                   | sleep* or slumber* or nighttime or nocturnal or bed                                             |
| <b>#4</b>       | Exclusions              | apnoea or apnea or CPAP                                                                         |

---

## Supplementary File: Author Reported Limitations

---

### *Author Reported Limitations*

---

| Author                          | Comments                                                                                                                                                                                                                                                                                                                                                                                            |
|---------------------------------|-----------------------------------------------------------------------------------------------------------------------------------------------------------------------------------------------------------------------------------------------------------------------------------------------------------------------------------------------------------------------------------------------------|
| Abanobi et al., 2015            | “Inability to compare the effect of duration of habits and age at onset of habit” (p. 336)<br>“Limited time set aside for the surveillance exercise” (p. 336)                                                                                                                                                                                                                                       |
| Cary et al., 2016               | “Mismatch in time frame of measurement” (p. 6). Recording of sleep posture occurred over 2 nights but participants questioned about symptoms over prior 1 month.                                                                                                                                                                                                                                    |
| Desouzart et al., 2016          | Due to the population studied it was “not possible to use a homogenous sample and larger number of participants.” (p. 239)<br>“The four weeks may not have been sufficient to create habits in participants, however, and because of the time limitations of this study, it was not possible to have a longer time.” (p. 239)<br>“results are based on the statements of the participants” (p. 239) |
| Gordon, Grimmer and Trott, 2007 | “As small subject numbers constrained confidence in the findings, further research is required into the contributors to waking symptoms. for upright sleepers” (p. 6)                                                                                                                                                                                                                               |

# BMJ Open

## Identifying relationships between sleep posture and non-specific spinal symptoms in adults: A scoping review

|                                 |                                                                                                                                                                                                                                                                                                                                               |
|---------------------------------|-----------------------------------------------------------------------------------------------------------------------------------------------------------------------------------------------------------------------------------------------------------------------------------------------------------------------------------------------|
| Journal:                        | <i>BMJ Open</i>                                                                                                                                                                                                                                                                                                                               |
| Manuscript ID                   | bmjopen-2018-027633.R1                                                                                                                                                                                                                                                                                                                        |
| Article Type:                   | Research                                                                                                                                                                                                                                                                                                                                      |
| Date Submitted by the Author:   | 01-Apr-2019                                                                                                                                                                                                                                                                                                                                   |
| Complete List of Authors:       | Cary, Doug; Curtin University, School of Physiotherapy and Exercise Science, Faculty of Health; AAP Education, Clinical Education<br>Briffa, Kathy; Curtin University, School of Physiotherapy and Exercise Science, Faculty of Health<br>McKenna, Leanda; Curtin University, School of Physiotherapy and Exercise Science, Faculty of Health |
| <b>Primary Subject Heading</b>: | Rehabilitation medicine                                                                                                                                                                                                                                                                                                                       |
| Secondary Subject Heading:      | General practice / Family practice, Evidence based practice, Communication                                                                                                                                                                                                                                                                    |
| Keywords:                       | sleep position, spinal symptoms, pain, stiffness, education, sleep posture                                                                                                                                                                                                                                                                    |
|                                 |                                                                                                                                                                                                                                                                                                                                               |

SCHOLARONE™  
Manuscripts



1  
2  
3  
4 1  
5  
6 2  
7  
8 3 Identifying relationships between sleep posture and non-specific spinal symptoms in  
9 adults: A scoping review  
10 4  
11 5  
12 6  
13  
14 6  
15

16 7 Corresponding author:

17 8 Mr Doug Cary

18 9 5 William Street, Esperance Western Australia 6450 Australia

19 10 dougcary@westnet.com.au

20 11 +61 890715055  
21  
22  
23  
24  
25  
26  
27  
28  
29

30 12  
31 13 Co-authors:

32 14 A/Prof Kathy Briffa

33 15 School of Physiotherapy and Exercise Science, Faculty of Health, Curtin University,  
34 16 Kent St, Bentley WA 6102, Australia  
35  
36  
37

38 17 Dr Leanda McKenna

39 18 School of Physiotherapy and Exercise Science, Faculty of Health, Curtin University,  
40 19 Kent St, Bentley WA 6102, Australia  
41  
42  
43  
44  
45  
46  
47  
48  
49  
50

51 20  
52 21  
53 22  
54 23 **General subject:** Research

55 24 **Subject headings:** Rehabilitative Medicine

56 25 **Keywords:** sleep posture, sleep position, spinal symptoms, pain, stiffness, education  
57  
58  
59  
60



## 27 Abstract

28 **Objectives:** The objectives of this scoping review were to identify (a) study designs  
29 and participant populations (b) types of specific methodology and (c) common  
30 results, conclusions and recommendations from the body of evidence regarding our  
31 research question; **is there a relationship between sleep posture and spinal**  
32 **symptoms.**

33 **Design:** Scoping review.

34 **Data sources:** PEDro, Embase, Cumulative Index to Nursing and Allied Health  
35 Literature, Cochrane Library, Medline, ProQuest, PsycINFO, SportDISCUS and grey  
36 literature from inception to April 10, 2018.

37 **Data selection:** Using a modified Arksey and O'Malley framework, all English  
38 language studies in humans that met eligibility criteria using key search terms  
39 associated with sleep posture and spinal symptoms were included.

40 **Data extraction:** Data were independently extracted by 2 reviewers and mapped to  
41 describe the current state of the literature. Articles meeting the search criteria were  
42 critically appraised using the Downs and Black checklist.

43 **Results:** From 4186 articles, four articles were identified, of which three were  
44 exploratory and one interventional. All studies examined three or more sleep  
45 postures, all measured sleep posture using self-report and one study also used  
46 infrared cameras. Two studies examined symptoms arising from the lumbar spine,  
47 one the cervical spine and one the whole spine. Waking pain and stiffness were the  
48 most common symptoms explored and side lying was generally protective against  
49 spinal symptoms.

50 **Conclusions:** This scoping review highlights the importance of evaluating sleep  
51 posture with respect to waking symptoms and has provided preliminary information  
52 regarding relationships between sleep posture and spinal symptoms. However, there  
53 were not enough high-quality studies to adequately answer our research question. It  
54 is recommended future research consider group sizes and population characteristics  
55 to achieve research goals, that a validated measure be used to assess sleep  
56 posture, that characteristics and location of spinal symptoms are clearly defined and  
57 that the side lying posture is subclassified.

## Strengths and Limitations of this Study

- This is the first scoping review collating and synthesising the available literature on sleeping posture and non-specific spinal symptoms
- A critical appraisal of evidence assessment was undertaken for each included study
- The lack of studies and small group sizes prevented firm recommendations being provided for all sleep posture

## Funding

Author (DC) acknowledges support from Australian Government Research Training Program Scholarship in supporting this research.

## Competing Interest

None declared.

## Data Sharing Statement

No additional data are available.

## Introduction

Cervical and lumbar symptoms like pain, are the leading cause of musculoskeletal disability in most countries and most age groups (1). Of those who report cervical and lumbar pain, the proportion is higher in females for both cervical (59%)(2) and lumbar (52%) pain(3). The prevalence of both cervical and lumbar pain has increased markedly over the past 25 years (cervical 21.1% and lumbar 17.3%), and these rates are expected to continue rising(1). Cervical and lumbar pain contribute to large economic and societal costs and are major sources of work disability, being either the first or second ranked cause of years lived with disability between the ages of 20 and 79 years(1, 4, 5). Research indicates that remissions in symptoms are temporary rather than permanent(6, 7) and cervical and lumbar pain becomes chronic in 25 to 60% of cases(8). Other types of symptoms like stiffness and bothersomeness, still important to patients are less well investigated (9, 10). Identification of modifiable risk factors contributing to the onset and chronicity of cervical and lumbar pain and other symptoms, is critical(11) to improve the management of cervical and lumbar pain.

1  
2  
3  
4 87 A potentially modifiable risk factor that aggravates spinal symptoms, is sleep  
5 88 posture. Sleep is considered essential for human mental and physical recovery. Yet,  
6 89 every night some people go to bed, only to wake with spinal symptoms not present  
7 90 the prior evening, while others with existing spinal symptoms, wake with  
8  
9 91 exacerbations of their symptoms(12, 13). For example, in young air force personnel,  
10 92 33% experienced their most intense spinal pain during the evening and on first  
11  
12 93 waking(12). It has been postulated that poor sleep posture may be a factor in the  
13  
14 94 development of both waking cervical(14-16) and lumbar symptoms(17, 18).

15  
16  
17  
18 95 Habitual sleep postures may influence the amount of load applied to spinal tissues  
19  
20 96 when sleeping. Compressive load due to gravity and muscle contraction(19, 20) is  
21  
22 97 likely to be far more during the day than during the night. In a 25-year review on the  
23  
24 98 fundamentals of spinal biomechanics, it was noted that spinal movements decreased  
25  
26 99 under a superimposed compression load. The author postulated this was due to  
27  
28 100 increased anular stiffness and increased zygapophyseal joint (ZPJ) contact(21).  
29  
30 101 Conversely, when lying down, the sources of spinal compression are minimal,  
31  
32 102 creating a low compression environment, potentially allowing an increased range of  
33  
34 103 spinal movement. The combination of increased range and asymmetrical loading  
35  
36 104 posture may result in altered and/or additional loading of viscoelastic collagenous  
37  
38 105 restraints like the ZPJ capsule and ligaments(22). Viscoelastic tissues are vulnerable  
39  
40 106 to sustained or repeated low elongation loads, and undergo predictable mechanical  
41  
42 107 and viscoelastic changes. Ligaments in feline spines exposed to 60 minutes of  
43  
44 108 repeated low load, demonstrate a significant increase in the expression of pro-  
45  
46 109 inflammatory chemicals, compared with control ligaments from the same spine,  
47  
48 110 indicating acute inflammation and tissue degradation in ligaments subjected to the  
49  
50 111 cyclic loading(23). Additionally, sustained non-symmetrical sleep postures can  
51  
52 112 induce structural spinal changes in humans(24, 25). Sleep postures have been  
53  
54 113 shown to be modifiable(17, 26) and identification of modifiable risk factors related to  
55  
56 114 spinal pain, have been highlighted as a priority in managing disabling lumbar  
57  
58 115 pain(27).

59  
60 116 Some sleep postures, such as prone, are clinically believed to increase load on  
117  
118 117 spinal tissues, reducing recovery and provoking waking spinal symptoms(18, 28, 29).  
While some sleep research has examined the role sleep posture may have on spinal

1  
2  
3  
4 119 symptoms(13, 17, 30), there has been no synthesis of the literature in regards to  
5 120 sleep posture and spinal symptoms.  
6  
7

## 8 121 **Methods**

### 10 122 **Search Framework**

11 123 This scoping review was developed using the methodological framework proposed  
12  
13  
14 124 by previous authors(31), further refined by other independent authors and  
15  
16 125 institutes(32-34) and reported in line with key PRISMA-ScR guidelines(35).  
17  
18  
19

### 20 126 ***Research Question***

21  
22  
23 127 Following an individual review of the literature and a group meeting, an authors'  
24 128 consensus was reached to determine the following research question; is there a  
25 129 relationship between sleep posture and spinal symptoms?  
26  
27  
28

### 29 130 ***Aim and Objectives***

30  
31 131 The aim of this scoping review was to gain a clear understanding of the current  
32 132 knowledge base in relation to the identified research question. To achieve this aim,  
33 133 an iterative process involving electronic meetings and communication between  
34 134 authors was used to determine the following research objectives:  
35  
36  
37

- 38 135 • Identify what study designs and participant populations have been studied to answer  
39 136 the research question.
- 40 137 • Identify the types of specific methodology used in the body of evidence to address  
41 138 the research question.
- 42 139 • Identify common results, conclusions and recommendations from the body of  
43 140 evidence regarding the research question.  
44  
45  
46  
47

### 48 141 **Eligibility Criteria**

49  
50  
51 142 Eligibility criteria were based upon the population, intervention, comparison and  
52 143 outcome (PICO) framework. A draft list of eligibility criteria was initially determined  
53 144 following the independent screening of relevant articles by two reviewers. Criteria  
54 145 were then developed iteratively between two reviewers and a finalised list of criteria  
55 146 were uploaded to Covidence(36), as a reference for data charting reviewers.  
56  
57  
58  
59  
60

### 147 ***Inclusion Criteria***

148 For inclusion in this scoping review, the prior research needed to study participants  
149 18 years or older, with either pain, stiffness or bothersomeness in the cervical,  
150 thoracic or lumbar spine. Any observational or interventional study examining the  
151 relationship between sleep posture and spinal symptoms was considered. Articles  
152 that either compared sleep posture change (e.g., before and after an intervention) or  
153 had no comparator (e.g., epidemiological) were included. Articles needed to use a  
154 subjective or objective measure for symptoms and sleeping posture.

### 155 ***Exclusion Criteria***

156 Articles were excluded if they involved animals, cadavers or included participants  
157 diagnosed with sleep apnoea, spinal stenosis, migraine, red flag pathologies (e.g.,  
158 neoplasm, inflammatory conditions, fractures or infections); participants with pain of  
159 known non-spinal origin (e.g., kidney disease, post-operative pain,  
160 temporomandibular joint, shoulder pain); participants with neurological conditions  
161 (e.g., multiple sclerosis, cerebrovascular accident); or participants that were unable  
162 to move freely in bed (e.g., using continuous positive airway pressure therapy or in  
163 the last trimester of pregnancy). Articles were excluded if they did not isolate the  
164 intervention when a group of interventions were implemented (e.g., spinal injection  
165 and sleeping posture) or if they compared sleep systems (e.g., mattress, base and or  
166 pillow) or changes in sleep systems but did not report the change in sleep posture.  
167 Further, articles using actigraphy to measure movement or articles that only  
168 examined the quality or efficacy of sleep were excluded. Finally, editorials, opinion-  
169 based articles, review articles (systematic or narrative) and articles not written in  
170 English were excluded.

### 171 **Patient and Public Involvement**

172 Patients and the public were not involved in this scoping review.

### 173 **Search Terms and Strategy**

174 The population, intervention, comparison and outcome (PICO) framework was used  
175 to assist in the collation of all elements relevant to clinical research questions.

176 Population: Terms used for the search strategy were chosen to be representative of

1  
2  
3  
4 177 the areas and symptoms, likely to be experienced by a population with non-specific  
5 178 spinal symptoms. Non-specific symptoms are those not related to fracture, infection,  
6 179 inflammatory disease, tumor or spinal stenosis. Intervention: Terms representative of  
7 180 interventions aimed at changing sleep posture in association with spinal symptoms  
8 181 were considered for inclusion, while other terms not associated with spinal  
9 182 symptoms e.g. apnoea were excluded. Comparison: Terms were considered that  
10 183 were indicative of any type of comparison. Outcome: Any terms to indicate the  
11 184 subjective measure of pain, stiffness or bothersomeness or objective measure used  
12 185 to evaluate sleep posture, were considered.

13  
14  
15  
16  
17  
18  
19 186 Identified key search terms were then used in the search strategy to identify all  
20 187 relevant articles. An initial search was conducted in two of the four databases,  
21 188 recommended(37) for physiotherapy related topics; PEDro, and Embase (via Ovid)  
22 189 from inception to December 2017. The initial search was used to determine if the  
23 190 search terms and strategy were appropriate, and informed the development of the  
24 191 final search terms and strategy.

25 192 The final search strategy was conducted using the search terms and Boolean logic  
26 193 as described in [Supplementary File Search Strategy for the Scopus Database](#) and  
27 194 adapted for eight electronic databases (PEDro, Embase, Cumulative Index to  
28 195 Nursing and Allied Health Literature, Cochrane Library, Medline, ProQuest,  
29 196 PsycINFO, SportDISCUS) with the assistance of a health sciences information  
30 197 specialist. Grey literature (espace, Google Scholar (top 100 references scanned for  
31 198 relevance), and Web of Science) was searched for difficult to locate or unpublished  
32 199 material that had not already been included. The final step involved manual  
33 200 searching the reference sections of relevant articles and publications by key authors  
34 201 for additional articles, not identified in the original search.

## 202 **Study Selection**

203 All search results were imported into the reference management software package,  
204 Endnote X8(38) and duplicates removed. Remaining results were imported into  
205 Covidence(36) and additional duplicates removed. Using Covidence, two reviewers  
206 independently performed Level 1 (title and abstract) and Level 2 (full text) screening,  
207 based on the eligibility criteria. Differences of opinion in which articles progressed to



1  
2  
3  
4 208 the next level, were first resolved with discussion between reviewers and if  
5 209 necessary, with input from a third reviewer.  
6  
7

## 8 210 **Data Charting**

9  
10 211 The data charting form was developed and revised iteratively between reviewers to  
11 212 ensure data relevant to the three research objectives were collected. A definitions  
12 213 and instructions document was developed to ensure that data was collected  
13 214 consistently by the independent reviewers. The data charting form was then  
14 215 independently pilot tested in duplicate on a random sample of four potential articles.  
15 216 Following identification of articles for inclusion in this review, data were  
16 217 independently charted in duplicate using a data charting form created in Excel and  
17 218 based on the three research objectives. An attempt was made to contact authors of  
18 219 eligible articles where authors reported that data relevant to our scoping review had  
19 220 been collected but was not publicly available, and to clarify points relevant to our  
20 221 data charting.  
21  
22  
23  
24  
25  
26  
27  
28  
29

## 30 222 **Quality of Evidence**

31  
32 223 Non-assessment of methodological quality and the risk of bias is consistent with  
33 224 current guidelines on conducting a scoping review(32, 34). However, a focus of this  
34 225 scoping review was on methodology; therefore, a methodological assessment of  
35 226 quality was included. The Downs and Black checklist(39) was chosen, as it has  
36 227 documented criterion validity, face and content validity, intra-rater ( $r = 0.88$ ) and  
37 228 inter-rater reliability ( $r = 0.75$ ) and guidelines for use(40). A modified version of the  
38 229 Downs and Black checklist(41), where a dichotomous score for power (question 27)  
39 230 was used. As a result, the maximum score for randomised trials was 28 and for non-  
40 231 randomised trials it was 25. The Downs and Black checklist was independently  
41 232 completed for each article in duplicate. Differences in scoring were first resolved by  
42 233 consensus between reviewers and if required, by a third independent reviewer.  
43 234 Study limitations noted by authors were collected to compliment the Downs and  
44 235 Black checklist.  
45  
46  
47  
48  
49  
50  
51  
52  
53  
54  
55  
56  
57  
58  
59  
60

1  
2  
3  
4  
5  
6  
7  
8  
9  
10  
11  
12  
13  
14  
15  
16  
17  
18  
19  
20  
21  
22  
23  
24  
25  
26  
27  
28  
29  
30  
31  
32  
33  
34  
35  
36  
37  
38  
39  
40  
41  
42  
43  
44  
45  
46  
47  
48  
49  
50  
51  
52  
53  
54  
55  
56  
57  
58  
59  
60

*Table 1. Mapping of Study Design and Population Characteristics*

| Author                          | Study Design                     | Population Type                                                                                | Sample Size (Gender) | Age <i>M</i> ( <i>SD</i> )     |
|---------------------------------|----------------------------------|------------------------------------------------------------------------------------------------|----------------------|--------------------------------|
| Abanobi et al., 2015            | Epidemiological: Case controlled | Welders in Owerri, Nigeria                                                                     | 100 (male = 100)     | 35 (9)                         |
| Cary et al., 2016               | Epidemiological: Cross sectional | Population of convenience in Esperance, Western Australia                                      | 15 (male = 7)        | 44 (17)                        |
| Desouzart et al., 2016          | Controlled pilot                 | Elderly participants in physical activity program at Polytechnic Institute of Leiria, Portugal | 20 (male = 0)        | 62 (4)                         |
| Gordon, Grimmer and Trott, 2007 | Epidemiological: Cross sectional | Every third household in Port Lincoln in South Australia                                       | 812 (male = 261)     | Female 61 (10)<br>Male 59 (11) |

Notes. *M* = Mean, *SD* = Standard deviation

## 236 Results

### 237 Search Results

238 An overview of the article identification process is provided in the PRISMA flow  
239 diagram in Figure 1. Articles excluded due to wrong outcomes, were those that did  
240 not include a measure of sleep posture or only examined sleep posture and not  
241 symptoms, tested a sleeping system (e.g., mattress or pillow) in relation to spinal  
242 symptoms but not posture, or studied sleep posture in relation to sleep quality.  
243 Articles excluded due to wrong study design included treatment guidelines, opinion  
244 and editorial piece and summaries.

### 245 [FIGURE 1 PRISMA FLOW DIAGRAM \(SEPARATE FILE\)](#)

### 246 Study Design and Population Characteristics

247 The designs of the four included studies were mixed (Table 1).

### 248 *Methodology: Sleep Posture Measurement*

249 All studies examined participants in their domestic environment (Table 2) and  
250 described as a minimum the three common sleep postures; supine, side lying and



1  
2  
3  
4 251 prone. One study described four sleep postures, dividing side lying into two sleep  
5 252 postures and named them supportive side lying and  $\frac{3}{4}$  side lying(42). Another  
6  
7 253 described five postures, adding “upright” and “varies”, to the common three sleep  
8  
9 254 postures(13). One study used three different postures, but combined side lying and  
10  
11 255 prone for analysis, due to small number of prone sleepers, of whom none reported  
12  
13 256 lumbar pain(43). All studies used self-report questionnaires to assess sleep posture.  
14  
15 257 Studies focused on different time points when questioning about sleep posture. Two  
16  
17 258 specifically focused on night and waking posture; “in what sleep posture do you  
18  
19 259 usually go to sleep”, “in what sleep posture do you usually wake up” and “in what  
20  
21 260 sleep posture do you spend most of the night”(13)(p. 7), and “which posture most  
22  
23 261 closely resembles the posture you are lying in when you fall asleep?” and “which  
24  
25 262 posture most closely resembles the posture you are lying in when you wake  
26  
27 263 up?”(42). The other two studies were non-specific, “usual sleep posture”(43)(p. 335)  
28  
29 264 and “informal questionnaire for ... sleeping position”(17)(p. 237). In addition to using  
30  
31 265 self-report, the authors of one study used an objective method of assessment, twin  
32  
33 266 camera infrared video recording, to verify sleep posture(42).  
34  
35  
36  
37  
38  
39  
40  
41  
42  
43  
44  
45  
46  
47  
48  
49  
50  
51  
52  
53  
54  
55  
56  
57  
58  
59  
60

1  
2  
3  
4  
5  
6  
7  
8  
9  
10  
11  
12  
13  
14  
15  
16  
17  
18  
19  
20  
21  
22  
23  
24  
25  
26  
27  
28  
29  
30  
31  
32  
33  
34  
35  
36  
37  
38  
39  
40  
41  
42  
43  
44  
45  
46

*Table 2. Mapping of Sleep Posture Measurement and Symptoms*

| Author                          | Sleep Environment | Standard three sleep postures | Number of sleep postures | Sleep posture outcome measurement | Anatomical Area               | Symptom Type                                 | Symptom(s) Characteristics                 | Symptom Outcome Measurement                    |
|---------------------------------|-------------------|-------------------------------|--------------------------|-----------------------------------|-------------------------------|----------------------------------------------|--------------------------------------------|------------------------------------------------|
| Abanobi et al., 2015            | Domestic          | Y                             | 3                        | SR                                | Lumbar                        | Pain                                         | Past and present history                   | Questionnaire - face to face interview         |
| Cary et al., 2016               | Domestic          | Y                             | 4                        | SR + Video recording              | Cervical, Lumbar, Both, Other | Pain, Stiffness                              | Frequency (month) Waking symptoms          | Questionnaire written                          |
| Desouzar et al., 2016           | Domestic          | Y                             | 3                        | SR                                | All spine                     | Pain                                         | Intensity                                  | Questionnaire written - pain VAS               |
| Gordon, Grimmer and Trott, 2007 | Domestic          | Y                             | 5                        | SR                                | Cervical                      | Pain, Stiffness, HA, Shoulder blade/arm pain | Frequency (week), duration Waking symptoms | Questionnaire - structured telephone interview |

*Notes.* NS = Not stated, Y = Yes, SR = Self-report, HA = Headache, VAS = Visual analogue scale

### 271 ***Methodology: Measurement of Symptoms***

272 The anatomical location, characteristics and method of measuring spinal symptoms  
273 are presented in Table 2. One study included non-spinal symptoms (e.g., hip and  
274 legs) classified as “other”(42). All studies examined pain (with two studies examining  
275 additional symptoms), but differed in regards to examining intensity, frequency,  
276 period of symptoms and diurnal/nocturnal presence. In one study, participants  
277 answered a “question on LBP history, such as present and past low back  
278 history”(43)(p. 333) and another asked participants “the frequency and location of  
279 morning symptoms of spine pain and stiffness that occurred during the past  
280 month”(42)(p. 2). In the other two studies, one described the frequency and duration  
281 of morning pain and stiffness over the prior week, but not intensity(13) while the  
282 other used a visual analogue scale (VAS) to measure pain intensity “at moment of  
283 response” but not frequency or duration(17)(p. 237).

### 284 ***Methodology: Interventions and Follow-ups***

285 Only participants in the treatment group of the intervention study(17) received sleep  
286 posture education. Those with dorsal or lumbar symptoms were advised to sleep  
287 supine, those with cervical symptoms were advised to sleep in side lying and prone  
288 sleepers were advised to adopt either of the prior recommended sleep postures.  
289 Participants were also educated about the use of pillows and how to get up and lie  
290 down. The control group received no instruction and neither group received further  
291 contact until reassessment. The intervention phase lasted 4 weeks. A significant  
292 reduction in pain was reported in the treatment group but not the control group.  
293 However, sleep posture was not objectively confirmed at baseline or after the  
294 intervention period.

### 295 ***Results, Conclusions and Recommendations***

296 Results from all studies reported trends or significant associations between spinal  
297 pain and certain sleep postures (Table 3). The authors from three studies reported  
298 increased symptoms, one associated with supine(43) one upright(13) and the other  
299 in prone or  $\frac{3}{4}$  side lying(42) sleep postures. The authors from two studies reported  
300 significantly decreased symptoms, one with side lying(13) and the other a  
301 combination of side lying and supine(17). In the intervention study the authors

*Table 3 Mapping of Results, Conclusions and Recommendations*

| Author               | Results                                                                                                                                                                                                                          | Conclusions                                                                                                                                                   | Recommendations |
|----------------------|----------------------------------------------------------------------------------------------------------------------------------------------------------------------------------------------------------------------------------|---------------------------------------------------------------------------------------------------------------------------------------------------------------|-----------------|
| Abanobi et al., 2015 | Odds ratios for LBP were in relation to a combined group of prone and side lying sleeping. "Sleeping with back (face up) increases the risk of developing low back pain by 1.9 times." (p. 355) (95% CI 0.43-8.56) <sup>^^</sup> | "The result showed the possibility of reducing the burden of LBP by appropriate training and improvement in habits such as...bad sleeping postures." (p. 336) | Not provided    |

302 reported a significant reduction in pain VAS for the intervention group but not the  
 303 control group (17). Between groups comparisons were not reported, possibly  
 304 because it was a pilot study. We used an online calculator(44) to determine an effect  
 305 size with 95% confidence intervals between groups, using baseline to post  
 306 intervention data in two steps. Baseline to post intervention change was used  
 307 because a significant difference between groups existed at baseline. Firstly, a pooled  
 308 standard deviation for each group was calculated for change from baseline to final  
 309 measure. Then this pooled standard deviation from each group was used to  
 310 calculate the between group effect size and 95% confidence interval (see Table 3).  
 311 The resultant confidence interval indicates that significant differences between  
 312 groups was unlikely. To calculate an effect size for Cary et.al. (42), the independent  
 313 samples Jonckheere-Terpstra test (45) was used to calculate a z-score, which was  
 314 then converted into an effect size ( $r_j$ ) (46).

315 Conclusions from authors of all four studies, were that sleep posture could increase  
 316 or decrease spinal pain, and that addressing sleep posture could reduce the  
 317 development of spinal pain. Using self-report, side lying was reported as protective  
 318 of spinal symptoms(13, 17) and participants that slept in supported side lying were  
 319 found to have less symptoms than those sleeping in  $\frac{3}{4}$  side lying or prone(42). In  
 320 regards to supine, one study found supine increased the likelihood of lumbar pain by  
 321 1.9 times(43), another study recommended supine in combination with side lying  
 322 sleep postures to reduce lumbar pain(17) and a third reported supine was not  
 323 significantly protective of cervical waking symptoms(13).

|                                                                                                                                                                      |                                 |                                                                                                                                                                                                                                                                                                                                                                                                                                                                                                                                                                                                                                                                                                                                                                                                                                                                                                                                                                                                                                                                              |                                                                                                                                                                                                                                                                                                                                                                                                     |                                                                                                                                                                                                          |
|----------------------------------------------------------------------------------------------------------------------------------------------------------------------|---------------------------------|------------------------------------------------------------------------------------------------------------------------------------------------------------------------------------------------------------------------------------------------------------------------------------------------------------------------------------------------------------------------------------------------------------------------------------------------------------------------------------------------------------------------------------------------------------------------------------------------------------------------------------------------------------------------------------------------------------------------------------------------------------------------------------------------------------------------------------------------------------------------------------------------------------------------------------------------------------------------------------------------------------------------------------------------------------------------------|-----------------------------------------------------------------------------------------------------------------------------------------------------------------------------------------------------------------------------------------------------------------------------------------------------------------------------------------------------------------------------------------------------|----------------------------------------------------------------------------------------------------------------------------------------------------------------------------------------------------------|
| 1<br>2<br>3<br>4<br>5<br>6<br>7<br>8<br>9<br>10<br>11<br>12<br>13<br>14<br>15<br>16<br>17<br>18<br>19<br>20<br>21<br>22                                              | Cary et al.,<br>2016            | “The time spent in each of the sleeping postures... expressed as a percentage of the time spent asleep, did not differ significantly according to the level of morning symptoms” (p. 5) Independent Samples Jonckheere-Terpstra Test; supine $r_j = 0.03$ ; SSL $r_j = 0.00$ ; $\frac{3}{4}$ SL $r_j = 0.34$ ; prone $r_j = 0.31$ .                                                                                                                                                                                                                                                                                                                                                                                                                                                                                                                                                                                                                                                                                                                                          | “participants that spent greater periods of time in SSL, had less mornings of symptoms per month than those that slept in $\frac{3}{4}$ SL or prone.” (p. 5)                                                                                                                                                                                                                                        | Not provided                                                                                                                                                                                             |
| 23<br>24<br>25<br>26<br>27<br>28<br>29<br>30<br>31<br>32                                                                                                             | Desouzar et al., 2016           | No between group comparison reported. Between group effect size calculated to be 0.81 (95% CI -0.11 to 1.72).                                                                                                                                                                                                                                                                                                                                                                                                                                                                                                                                                                                                                                                                                                                                                                                                                                                                                                                                                                | “It may be concluded that the indication of the ideal way to lie down, which corresponds to a recommended sleeping posture with the ideal position to place the pillows, as well as the ideal way to get up.” (p. 239)                                                                                                                                                                              | Ideal sleep posture, pillow use and way to get up, as per experimental group, “is an added value for the prevention and decrease of the pain and/or discomfort in the spine in active seniors.” (p. 239) |
| 33<br>34<br>35<br>36<br>37<br>38<br>39<br>40<br>41<br>42<br>43<br>44<br>45<br>46<br>47<br>48<br>49<br>50<br>51<br>52<br>53<br>54<br>55<br>56<br>57<br>58<br>59<br>60 | Gordon, Grimmer and Trott, 2007 | “Subjects who reported sleeping mostly in an upright position were significantly more likely to report all waking symptoms of interest compared to subjects who slept in other positions.” (p. 6) Waking cervical pain OR 2.5 (95% CI 1.1-5.5), cervical stiffness OR 2.6 (95% CI 1.1-5.8), headache OR 2.2 (95% CI 1.0-5.0), scapular/arm pain OR 2.5 (95% CI 1.1-5.3).<br>“Supine...was not found in this study to be significantly protective of waking symptoms, when compared to other sleep positions.” (p. 6) Waking cervical pain OR 1.4 (95% CI 0.8-2.5) and cervical stiffness OR 0.9 (95% CI 0.5-1.6).<br>“Prone...was not significantly associated with waking symptom” (p. 6) Cervical pain OR 1.5 (95% CI 0.7-3.2) and cervical stiffness OR 1.1 (95% CI 0.5-2.6).<br>“Subjects who reported that they slept mostly on their side were significantly less likely to report waking cervical pain... compared with subjects who slept in any other position.” (p. 4) Waking cervical pain OR 0.6 (95% CI 0.4-0.9) and scapular/arm pain OR 0.7 (95% CI 0.5-0.9). | “on the basis of this research side lying can be confidently recommended as the best sleep position in terms of minimising waking symptoms.” (p. 6)<br>“need for health professionals to consider individual’s sleep position and waking symptom history, as part of clinical reasoning for treatment, and when developing a management plan for patients with troublesome waking symptoms.” (p. 6) |                                                                                                                                                                                                          |

---

Notes. LBP = Low back pain, SSL = Supported side lying, ¾ SL = ¾ side lying, VAS = Visual analogue scale, OR = Odds ratio, CI = Confidence interval,  $r_j$  = effect size r for Jonckheere-Terpstra Test

^^ The CI was recalculated as it was suspected wrong due a typographical error. The original value was 0.431

324 Two studies recommended clinicians consider sleep posture to reduce cervical(13)  
325 and lumbar symptoms(17).

### 326 *Quality of Evidence and Author Reported Limitations*

327 The quality of evidence is summarised in Table 4. The Downs and Black checklist  
328 contains 27 questions distributed over five domains; reporting (i.e., aims, sampling  
329 and methods); external validity (i.e., generalisability); internal validity (i.e., study  
330 design, selection bias, performance and reporting bias); confounding; and power  
331 (39). Using the Downs and Black checklist as the appraisal tool, evidence levels  
332 have previously been categorised as strong (> 75%), moderate (50 - 74%), limited  
333 (25 - 49%) and poor quality (< 24%)(47). Questions 4, 8, 9, 13, 14, 15, 19, 23, 24,  
334 and 26 (see Table 4 for details) were not applicable to study designs that did not  
335 include an intervention group and were therefore excluded from the three exploratory  
336 studies(13, 42, 43). Question 27 was applicable for all but the cross sectional  
337 study(42). In the reporting subsection, questions one to 10, studies were well  
338 documented with one different applicable question not completed by each study,  
339 enabling readers to draw unbiased assessments of each study's findings. Questions  
340 11 to 13 (external validity), were poorly reported, with all studies failing to quantify  
341 the proportion of participants that were asked, relative to the proportion of  
342 participants that were accepted into studies. All studies reported using either  
343 random(13, 17, 43) or consecutive sampling(42). Internal validity, questions 14 to 20,  
344 examined measurement bias and apart from question 15 were well documented. In  
345 all studies, no attempt was made to blind researchers measuring the outcome  
346 variables. However, in one exploratory study the interview method precluded the  
347 need for blinding of interviewers(13). All the remaining questions were well  
348 documented, except for question 25 which examined confounding factors. This was  
349 poorly documented except for one study(48), in which a multivariate analysis was  
350 reported in a subsequent study, using the same data. The body of evidence in this  
351 scoping review is rated as moderate to strong quality.

352

*Table 4 Critical Appraisal of Included Studies Using the Downs and Black Checklist*

| Section           | Questions                                                                                                                                                    | Abanobi et al., 2015 | Cary et al., 2016 | Desouzart et al., 2016 | Gordon, Grimmer and Trott, 2007 |
|-------------------|--------------------------------------------------------------------------------------------------------------------------------------------------------------|----------------------|-------------------|------------------------|---------------------------------|
| Reporting         | 1 Is the hypothesis/aim/objective of the study clearly described?                                                                                            | Y                    | Y                 | Y                      | Y                               |
|                   | 2 Are the main outcomes to be measured clearly described in the Introduction or Methods section?                                                             | N                    | Y                 | Y                      | Y                               |
|                   | 3 Are the characteristics of the patients included in the study clearly described?                                                                           | Y                    | N                 | Y                      | X                               |
|                   | 4 Are the interventions of interest clearly described?                                                                                                       | X                    | X                 | Y                      | X                               |
|                   | 5 Are the distributions of principal confounders in each group of subjects to be compared clearly described?                                                 | *Y                   | X                 | *Y                     | *Y                              |
|                   | 6 Are the main findings of the study clearly described?                                                                                                      | Y                    | Y                 | Y                      | Y                               |
|                   | 7 Does the study provide estimates of the random variability in the data for the main outcomes?                                                              | Y                    | Y                 | Y                      | Y                               |
|                   | 8 Have all important adverse events that may be a consequence of the intervention been reported?                                                             | X                    | X                 | N                      | X                               |
|                   | 9 Have the characteristics of patients lost to follow-up been described?                                                                                     | X                    | X                 | Y                      | X                               |
|                   | 10 Have actual probability values been reported (e.g., 0.035 rather than <0.05) for the main outcomes except where the probability value is less than 0.001? | Y                    | Y                 | Y                      | N                               |
| External Validity | 1 Were the subjects asked to participate in the study representative of the entire population from which they were recruited?                                | Y                    | Y                 | N                      | Y                               |
|                   | 2 Were those subjects who were prepared to participate representative of the entire population from which they were recruited?                               | U                    | N                 | N                      | N                               |

1  
2  
3  
4  
5  
6  
7  
8  
9  
10  
11  
12  
13  
14  
15  
16  
17  
18  
19  
20  
21  
22  
23  
24  
25  
26  
27  
28  
29  
30  
31  
32  
33  
34  
35  
36  
37  
38  
39  
40  
41  
42  
43  
44  
45  
46

|                                   |        |                                                                                                                                                                                                                           |   |   |   |   |
|-----------------------------------|--------|---------------------------------------------------------------------------------------------------------------------------------------------------------------------------------------------------------------------------|---|---|---|---|
|                                   | 1<br>3 | Were the staff, places, and facilities where the patients were treated, representative of the treatment the majority of patients receive?                                                                                 | X | X | Y | X |
| Internal Validity:<br>Bias        | 1<br>4 | Was an attempt made to blind study subjects to the intervention they have received?                                                                                                                                       | X | X | U | X |
|                                   | 1<br>5 | Was an attempt made to blind those measuring the main outcomes of the intervention?                                                                                                                                       | X | X | N | X |
|                                   | 1<br>6 | If any of the results of the study were based on "data dredging", was this made clear?                                                                                                                                    | Y | Y | Y | Y |
|                                   | 1<br>7 | In trials and cohort studies, do the analyses adjust for different lengths of follow-up of patients, or in case-control studies, is the time period between the intervention and outcome the same for cases and controls? | Y | X | Y | X |
|                                   | 1<br>8 | Were the statistical tests used to assess the main outcomes appropriate?                                                                                                                                                  | Y | Y | Y | Y |
|                                   | 1<br>9 | Was compliance with the intervention/s reliable?                                                                                                                                                                          | X | X | U | X |
|                                   | 2<br>0 | Were the main outcome measures used accurate (valid and reliable)?                                                                                                                                                        | Y | Y | Y | Y |
| Internal Validity:<br>Confounding | 2<br>1 | Were the patients in different intervention groups (trials and cohort studies) or were the cases and controls (case-control studies) recruited from the same population?                                                  | Y | X | Y | Y |
|                                   | 2<br>2 | Were study subjects in different intervention groups (trials and cohort studies) or were the cases and controls (case-control studies) recruited over the same period of time?                                            | Y | X | Y | X |
|                                   | 2<br>3 | Were study subjects randomised to intervention groups?                                                                                                                                                                    | X | X | Y | X |
|                                   | 2<br>4 | Was the randomised intervention assignment concealed from both patients and health care staff until recruitment was complete and irrevocable?                                                                             | X | X | U | X |



|                                                                                                                                                                                                                                                   |        |                                                                                                                                                               |       |      |       |       |
|---------------------------------------------------------------------------------------------------------------------------------------------------------------------------------------------------------------------------------------------------|--------|---------------------------------------------------------------------------------------------------------------------------------------------------------------|-------|------|-------|-------|
|                                                                                                                                                                                                                                                   | 2<br>5 | Was there adequate adjustment for confounding in the analyses from which the main findings were drawn?                                                        | N     | N    | N     | Y     |
|                                                                                                                                                                                                                                                   | 2<br>6 | Were losses of patients to follow-up taken into account?                                                                                                      | X     | X    | Y     | X     |
| Power                                                                                                                                                                                                                                             | 2<br>7 | Did the study have sufficient power to detect a clinically important effect where the probability value for a difference being due to chance is less than 5%? | N     | X    | N     | N     |
| Score                                                                                                                                                                                                                                             |        |                                                                                                                                                               | 14/17 | 9/12 | 19/28 | 12/14 |
| Percentage                                                                                                                                                                                                                                        |        |                                                                                                                                                               | 82    | 75   | 68    | 86    |
| <i>Notes.</i> N = No = 0, Y = Yes = 1, *Y = 2 points, U = Unable to determine = 0, X = Not applicable (see Quality of Evidence section), Evidence levels = strong (> 75%), moderate (50 - 74%), limited (25 - 49%) and poor quality (< 24%) (47). |        |                                                                                                                                                               |       |      |       |       |

353

354

355

356

357

1  
2  
3  
4 358 Authors identified reliance on self-report to examine sleep posture(17) and  
5 359 symptoms(48) as a limitation. Authors identified small sample sizes, as limiting their  
6  
7 360 ability to draw firm conclusions from the obtained results(13, 17). Authors identified  
8  
9 361 restricted time as a limitation, for the period available for data collection(43), and for  
10  
11 362 participants to learn a new sleeping habit(17). Limitations as reported by authors are  
12  
13 363 described in [Supplementary File Author Reported Limitations](#).

## 14 15 364 **Discussion**

16  
17 365 To our knowledge, this scoping review is the first to establish the body of evidence  
18  
19 366 regarding the research question; relationships between sleeping posture and spinal  
20  
21 367 symptoms. Generally, there was limited available research. In regards to Objective 1;  
22  
23 368 research designs and populations studied for the research question, a variety of  
24  
25 369 study designs and participant populations were used. One study was a controlled  
26  
27 370 pilot trial. With regards to Objective 2; types of specific methodology used to address  
28  
29 371 the research question, sleep was assessed in a domestic environment in all studies,  
30  
31 372 with self-report used to measure sleep posture in all studies. Pain was the most  
32  
33 373 common outcome measure of symptoms. In respect to Objective 3; results,  
34  
35 374 conclusions and recommendations, authors recommended side lying as the sleep  
36  
37 375 posture least likely to provoke cervical or lumbar spinal symptoms. Studies included  
38  
39 376 in this scoping review were of moderate to strong quality as assessed using the  
40  
41 377 Downs and Black critical appraisal tool. Nonetheless, considerably more research  
42  
43 378 including longitudinal studies are required before causal relationships between sleep  
44  
45 379 posture and spinal symptoms could be concluded.

46 380 The study designs identified in this scoping review were appropriate to use for the  
47  
48 381 research question. The variety of study designs prevented data pooling and a  
49  
50 382 scoping review remained the most appropriate approach to synthesise the research.  
51  
52 383 The age and gender ratios of included studies were not representative of typical  
53  
54 384 cervical and lumbar pain populations (1-3). Generalisation of the results of the  
55  
56 385 included studies needs to be considered with some caution because of a strong  
57  
58 386 gender bias in two studies(17, 43) and a restricted age of included participants in  
59  
60 387 one study (17). In general, small sample sizes were used. The type of study designs  
388  
389 and patient populations identified in this scoping review have provided preliminary  
information regarding relationships between sleep posture and spinal symptoms, but

1  
2  
3  
4 390 there were not enough high-quality studies to adequately answer our research  
5 391 question.

6  
7 392 The most common adult sleep postures are side lying, supine and prone (28, 49,  
8 393 50), which were the postures examined by the studies in this review. Side lying is the  
9 394 sleep posture that greater than 60% of European adults adopt for the majority of the  
10 395 night(28, 49, 50). For this reason, one study divided side lying into two sleep  
11 396 postures, based upon symmetry and plausible spinal load. These authors identified a  
12 397 trend that participants spending more time in symmetrical side lying reported less  
13 398 morning symptoms than those in asymmetrical side lying(42). Although all studies in  
14 399 this review utilised self-report to report sleep posture, some authors identified this as  
15 400 a limitation (13, 17, 42) and inaccuracy associated with sleep posture self-report can  
16 401 be as high as 33% (51, 52). It therefore seems prudent to not rely purely on self-  
17 402 report and clinicians would have higher confidence when advising people with pain  
18 403 about sleep posture, if research included both self-report and a valid and reliable  
19 404 measure of sleep posture, such as included in one study(42).

20 405 The anatomical features of the cervical and lumbar spine are different and it is  
21 406 plausible that sleeping postures could affect each area differently. For example,  
22 407 studies in this review indicated sleeping in supine was associated with lumbar  
23 408 symptoms(43), but not associated with cervical symptoms(13). Pain was measured  
24 409 in all studies, which is appropriate given cervical and lumbar pain are leading  
25 410 contributors across all age groups and countries to musculoskeletal disability(1).  
26 411 However, characteristics like intensity, frequency or the onset time of pain were not  
27 412 consistently measured and are important to better understand the overall impact pain  
28 413 is having on daily function(53). With regards to the relationship between sleep  
29 414 posture and time of onset of spinal symptoms, only half of the studies examined  
30 415 waking symptoms(13, 42). Waking spinal symptoms are rarely present every  
31 416 morning, which may be due to an individual's variation in sleep posture routine. To  
32 417 better understand the temporal relationships between sleep posture and spinal  
33 418 symptoms, it would be important to record spinal symptoms on first waking.

34 419 Spinal pain is a major and growing global health problem with increasing rates of  
35 420 disability(1). For the past 20 years there has been a strong biomedical focus on  
36 421 patho-anatomy as the cause of spinal pain. However, in the case of lumbar pain,  
37 422 only 8-15% of cases has a specific tissue identified as the cause(54). Concurrently,

1  
2  
3  
4 423 there has been an escalation in imaging, opioid prescription, injections and surgery,  
5 424 with questionable benefit(55-57) and higher risks(8, 58). Changing physical risk  
6 425 factors like type of movement pattern(59), level of strength and conditioning(60, 61)  
7 426 and sustained or repeated postures(62, 63) , are relatively risk free, cost effective  
8  
9 427 and show great potential. Sleep posture is an example of a sustained physical risk  
10 428 factor that is modifiable(64, 65). Clinical recommendations by authors included in this  
11  
12 429 review included considering sleep posture when developing management plans for  
13  
14 430 people with waking spinal symptoms(13) and education to change symptomatic  
15  
16 431 sleep postures (43). With regards to recommending a sleep posture to minimise  
17  
18 432 spinal symptoms, this review finds that the side lying posture for the cervical  
19  
20 433 spine(13), and side lying and supine were the sleep postures recommended by  
21  
22 434 authors for those with lumbar spinal pain(17). However, there is a lack of high-quality  
23  
24 435 studies from which to draw firm recommendations.

26 436 Based on the findings of this scoping review we offer the following recommendations  
27  
28 437 to improve the quality of future research. Research samples should be large enough  
29  
30 438 to achieve statistical goals and sample demographics should be representative of  
31  
32 439 those in the broader population with cervical and lumbar pain. Ideally studies should  
33  
34 440 account for confounding factors such as age and gender through study design or  
35  
36 441 statistical analysis. It would be preferable to differentiate spinal symptoms according  
37  
38 442 to location, rather than considering spinal symptoms as a single group, due to  
39  
40 443 differences in spinal anatomy, function and referral of symptoms. It is also  
41  
42 444 recommended to divide spinal symptoms into categories such as pain, stiffness, and  
43  
44 445 bothersomeness, to determine if one or more have greater clinical relevance. Using  
45  
46 446 a valid, objective measure of sleep posture instead of self-report, would also enable  
47  
48 447 determination of time spent in each sleep posture and the number of sleep posture  
49  
50 448 changes. As side lying appears to be associated with less cervical and possibly  
51  
52 449 spinal symptoms generally, it would be worthwhile in future research to confirm this  
53  
54 450 relationship and to further explore whether some subtypes of side lying postures are  
55  
56 451 less provocative of spinal symptoms than others. It would also be informative to  
57  
58 452 consider the temporal aspect of spinal symptoms. That is, recording spinal  
59  
60 453 symptoms on first waking before they are influenced by daytime activities. Sleep  
61  
62 454 posture is potentially modifiable following education(17) and education is a non-

1  
2  
3  
4 455 invasive and low-cost intervention which should be further explored in future  
5 456 research using larger scale longitudinal studies.  
6  
7

## 8 457 **Funding**

9

10 458 DC received PhD. Scholarship funding from Australian Government Research  
11  
12 459 Training Program.  
13  
14

## 15 460 **Author Contributors**

16

17  
18 461 DC, LM and KB designed the study. DC and LM collected data and conducted data  
19 462 analysis. DC wrote the manuscript. DC, and LM undertook interpretation of findings  
20  
21 463 and were involved in drafting the manuscript. All authors were involved in revision of  
22  
23 464 the manuscript gave final approval for submission and publication.  
24  
25  
26  
27  
28  
29  
30  
31  
32  
33  
34  
35  
36  
37  
38  
39  
40  
41  
42  
43  
44  
45  
46  
47  
48  
49  
50  
51  
52  
53  
54  
55  
56  
57  
58  
59  
60

## References

1. Hurwitz E, Randhawa K, Yu H, Côté P, Haldeman S. The Global Spine Care Initiative: A summary of the global burden of low back and neck pain studies. *European Spine Journal*. 2018;1-6.
2. Côté P, Cassidy J, Carroll L, Kristman V. The annual incidence and course of neck pain in the general population: A population-based cohort study. *Pain*. 2004;112:267-73.
3. Hoy D, Bain C, Williams G, March L, Brooks P, Blyth F, et al. A systematic review of the global prevalence of low back pain. *Arthritis & Rheumatology*. 2012;64(6):2028-37.
4. Ekman M, Johnell O, Lidgren L. The economic cost of low back pain in Sweden in 2001. *Acta Orthopaedica*. 2005;76:275-84.
5. Wasiak R, Kim J, Pransky G. Work disability and costs caused by recurrence of low back pain: Longer and more costly than in first episodes. *Spine*. 2006;31:219-25.
6. Croft P, Lewis M, Papageorgiou A, Thomas E, Jayson M, Macfarlane G, et al. Risk factors for neck pain: A longitudinal study in the general population. *Pain*. 2001;93:317-25.
7. Hestbaek L, Leboeuf-Yde C, Kyvik K, Manniche C. The course of low back pain from adolescence to adulthood: Eight-year follow-up of 9600 twins. *Spine*. 2006;31:468-72.
8. Manchikanti L, Singh V, Datta S, Cohen S, Hirsch J. Comprehensive review of epidemiology, scope, and impact of spinal pain. *Pain Physician*. 2009;12:35-70.
9. Hodges P, van den Hoorn W, Dawson A, Cholewicki J. Changes in the mechanical properties of the trunk in low back pain may be associated with recurrence. *Journal of biomechanics*. 2009;42(1):61-6.
10. Cho Y, Song Y, Cha Y, Shin B, Shin I, Park H, et al. Acupuncture for chronic low back pain. *Spine*. 2013;38(7):549-57.
11. Croft P, Dunn K, Raspe H. Course and prognosis of back pain in primary care: The epidemiological perspective. *Pain*. 2006;122:1-3.
12. Desouzart G, Vilar E, Melo F, Matos R, editors. Human bed interaction: A methodology and tool to measure postural behavior during sleep of the air force military. 3rd International Conference on Design, User Experience, and Usability; 2014 June; Heraklion, Greece.
13. Gordon S, Grimmer K, Trott P. Sleep position, age, gender, sleep quality and waking cervico-thoracic symptoms. *Internet Journal of Allied Health Sciences and Practice*. 2007;5.
14. Corrigan B, March L. Cervical spine dysfunction: A pain in the neck. *Patient Management*. 1984;8:48-53.
15. Gordon S, Trott P, Grimmer K. Waking cervical pain and stiffness, headache, scapular or arm pain: Gender and age effects. *Australian Journal of Physiotherapy* 2002;48.
16. McKenzie R. The cervical and thoracic spine: Mechanical diagnosis and therapy. Waikanae: Spinal Publications; 1990.
17. Desouzart G, Matos R, Melo F, Filgueiras E. Effects of sleeping position on back pain in physically active seniors: A controlled pilot study. *Work: A Journal of Prevention, Assessment & Rehabilitation*. 2016;53:235-40.
18. Gracovetsky S. The resting spine: A conceptual approach to the avoidance of spinal reinjury during rest. *Physical Therapy*. 1987;67:549-53.
19. Dolan P, Earley M, Adams M. Bending and compressive stresses acting on the lumbar spine during lifting activities. *Journal of Biomechanics*. 1994;27:1237-48.
20. Kingma I, Baten C, Dolan P, Toussaint H, van Dieën J, de Looze M, et al. Lumbar loading during lifting: A comparative study of three measurement techniques. *Journal of Electromyography and Kinesiology*. 2001;11:337-45.
21. Oxland T. Fundamental biomechanics of the spine: What we have learned in the past 25 years and future directions. *Journal of Biomechanics*. 2016;49:817-32.
22. Adams M, Hutton W. The relevance of torsion to the mechanical derangement of the lumbar spine. *Spine*. 1981;6:241-8.



- 1  
2  
3 514 23. Solomonow M. Neuromuscular manifestations of viscoelastic tissue degradation following  
4 515 high and low risk repetitive lumbar flexion. *Journal of Electromyography and Kinesiology*.  
5 516 2012;22:155-75.  
6 517 24. Hill S, Goldsmith J. Biomechanics and prevention of body shape distortion. *Tizard Learning*  
7 518 *Disability Review*. 2010;15:15-32.  
8 519 25. Waugh A, Hill S. Body shape distortion: Promoting postural care at night. *Learning Disability*  
9 520 *Practice*. 2009;12:25-9.  
10 521 26. Murayama R, Kubota T, Kogure T, Aoki K. The effects of instruction regarding sleep posture  
11 522 on the postural changes and sleep quality among middle-aged and elderly men: A preliminary study.  
12 523 *Bioscience Trends*. 2011;5(3):111-9.  
13 524 27. Buchbinder R, Tulder M, Öberg B, Menezes Costa L, Woolf A, Schoene M, et al. Low back  
14 525 pain: A call for action. *The Lancet*. 2018;391:2384-8.  
15 526 28. De Koninck J, Lorrain D, Gagnon P. Sleep positions and position shifts in five age groups: An  
16 527 ontogenetic picture. *Sleep*. 1992;15:143-9.  
17 528 29. Goldman S. Nocturnal neuropathic pain in diabetic patients may be caused by spinal  
18 529 stenosis. *Diabetic Medicine*. 2005;22:1763-5.  
19 530 30. Desouzart G, Filgueiras E, Melo F, Matos R, editors. Human body-sleep system interaction in  
20 531 residence for university students: Evaluation of interaction patterns using a system to capture video  
21 532 and software with observation of postural behaviors during sleep. 5th International Conference on  
22 533 Applied Human Factors and Ergonomics; 2014 July; Kraków, Poland.  
23 534 31. Arksey H, O'Malley L. Scoping studies: Towards a methodological framework. *International*  
24 535 *Journal Social Research Methodology*. 2005;8:19-32.  
25 536 32. Khalil H, Peters M, Godfrey C, McInerney P, Soares C, Parker D. An evidence-based approach  
26 537 to scoping reviews. *Worldviews on Evidence-Based Nursing*. 2016;13(2):118-23.  
27 538 33. Levac D, Colquhoun H, O'Brien K. Scoping studies: Advancing the methodology.  
28 539 *Implementation Science*. 2010;5:9.  
29 540 34. Peters M, Godfrey C, Khalil H, McInerney P, Parker D, Soares C. Guidance for conducting  
30 541 systematic scoping reviews. *International Journal of Evidence Based Healthcare*. 2015;13:141-6.  
31 542 35. Tricco A, Lillie E, Zarin W, O'Brien K, Colquhoun H, Levac D, et al. PRISMA extension for  
32 543 scoping reviews (PRISMA-ScR): Checklist and explanation. *Annals of Internal Medicine*. 2018.  
33 544 36. Covidence. Melbourne Australia: Veritas Health Innovation; 2018.  
34 545 37. Michaleff Z, Costa L, Moseley A, Maher C, Elkins M, Herbert R, et al. CENTRAL, PEDro,  
35 546 PubMed, and EMBASE are the most comprehensive databases indexing randomized controlled trials  
36 547 of physical therapy interventions. *Physical Therapy*. 2011;91:190-7.  
37 548 38. EndNote. X8 ed. Philadelphia USA: Clarivate Analytics; 2018.  
38 549 39. Downs S, Black N. The feasibility of creating a checklist for the assessment of the  
39 550 methodological quality both of randomised and non-randomised studies of health care  
40 551 interventions. *Journal of Epidemiology & Community Health*. 1998;52:377-84.  
41 552 40. Olivo S, Macedo L, Gadotti I, Fuentes J, Stanton T, Magee D. Scales to assess the quality of  
42 553 randomized controlled trials: A systematic review. *Physical Therapy*. 2008;88:156-75.  
43 554 41. Korakakis V, Whiteley R, Tzavara A, Malliaropoulos N. The effectiveness of extracorporeal  
44 555 shockwave therapy in common lower limb conditions: A systematic review including quantification  
45 556 of patient-rated pain reduction. *British Journal of Sports Medicine*. 2018;52:387-407.  
46 557 42. Cary D, Collinson R, Sterling M, Briffa K. Examining the relationship between sleep posture  
47 558 and morning spinal symptoms in the habitual environment using infrared cameras. *Journal of Sleep*  
48 559 *Disorders: Treatment and Care*. 2016;5.  
49 560 43. Abanobi O, Ayeni G, Ezeugwu C, Ayeni O. Risk-disposing habits of lowback pain amongst  
50 561 welders and panel beaters in Owerri, south-east Nigeria. *Indian Journal of Public Health*. 2015;6:332-  
51 562 7.  
52 563 44. Centre for Evaluation and Monitoring. Effect Size Calculator 2018 [Available from:  
53 564 <https://www.cem.org/effect-size-calculator>.  
54 565 45. IBM Corporation. SPSS Statistics for Mac. 25.0 ed. New York:USA: Armonk; 2018.

- 1  
2  
3 566 46. Field A. *Discovering Statistics Using IBM SPSS Statistics*. 5 ed. Los Angeles: SAGE Publications;  
4 567 2017.  
5 568 47. Hignett S. Intervention strategies to reduce musculoskeletal injuries associated with  
6 569 handling patients: A systematic review. *Occupational Environmental Medicine*. 2003;60:e6-e.  
7 570 48. Gordon S, Grimmer K, Trott P. Understanding sleep quality and waking cervico-thoracic  
8 571 symptoms. *Internet Journal of Allied Health Sciences and Practice*. 2007;5:1-12.  
9 572 49. Haex B. *Back and bed: Ergonomic aspects of sleeping*: Boca Raton: CRC Press; 2005.  
10 573 50. Gordon S, Grimmer K, Trott P. Self reported versus recorded sleep position: An observational  
11 574 study. *The Internet Journal of Allied Health Science and Practice*. 2004;2:1-10.  
12 575 51. Yu C. Why is self-report of sleep position sometimes unreliable? *Sleep and Hypnosis*.  
13 576 2018;20:105-13.  
14 577 52. Kaplowitz K, Blizzard S, Blizzard D, Nwogu E, Hamill C, Weinreb R, et al. Time spent in lateral  
15 578 sleep position and asymmetry in glaucoma. *Investigative Ophthalmology & Visual Science*.  
16 579 2015;56(6):3869-74.  
17 580 53. Gordon S, Grimmer-Somers K. Your pillow may not guarantee a good night's sleep or  
18 581 symptom-free waking. *Physiotherapy Canada*. 2010;63:183-90.  
19 582 54. Waddell G. *The back pain revolution*. 2 ed. Edinburgh: Churchill Livingstone; 2004.  
20 583 55. Atlas S, Keller R, Wu Y, Deyo R, Singer D. Long-term outcomes of surgical and nonsurgical  
21 584 management of sciatica secondary to a lumbar disc herniation: 10 year results from the Maine  
22 585 Lumbar Spine Study. *Spine*. 2005;30:927-35.  
23 586 56. Friedly J, Chan L, Deyo R. Increases in lumbosacral injections in the Medicare population:  
24 587 1994 to 2001. *Spine*. 2007;32:1754-60.  
25 588 57. Runciman W, Hunt T, Hannaford N, Hibbert P, Westbrook J, Coiera E, et al. CareTrack:  
26 589 Assessing the appropriateness of health care delivery in Australia. *Medical Journal of Australia*.  
27 590 2012;197:100-5.  
28 591 58. Luo X, Pietrobon R, Hey L. Patterns and trends in opioid use among individuals with back  
29 592 pain in the United States. *Spine*. 2004;29:884-90.  
30 593 59. O'Sullivan P. Diagnosis and classification of chronic low back pain disorders: Maladaptive  
31 594 movement and motor control impairments as underlying mechanism. *Manual Therapy*.  
32 595 2005;10(4):242-55.  
33 596 60. Gabel C, Mokhtarinia H, Hoffman J, Osborne J, Laakso E, Melloh M. Does the performance of  
34 597 five back-associated exercises relate to the presence of low back pain? A cross-sectional  
35 598 observational investigation in regional Australian council workers. *BMJ open*. 2018;8:e020946.  
36 599 61. Micheo W, Baerga L, Miranda G. Basic principles regarding strength, flexibility, and stability  
37 600 exercises. *PM&R*. 2012;4:805-11.  
38 601 62. Solomonow M, Baratta R, Banks A, Freudenberger C, Zhou B. Flexion relaxation response to  
39 602 static lumbar flexion in males and females. *Clinical Biomechanics*. 2003;18:273-9.  
40 603 63. Solomonow M, Zhou B, Lu Y, King K. Acute repetitive lumbar syndrome: A multi-component  
41 604 insight into the disorder. *Journal of Bodywork and Movement Therapies*. 2012;16(2):134-47.  
42 605 64. Cartwright R, Ristanovic R, Diaz F, Caldarelli D, Alder G. A comparative study of treatments  
43 606 for positional sleep apnea. *Sleep*. 1991;14(6):546-52.  
44 607 65. van Maanen J, de Vries N. Long-term effectiveness and compliance of positional therapy  
45 608 with the sleep position trainer in the treatment of positional obstructive sleep apnea syndrome.  
46 609 *Sleep*. 2014;37(7):1209-15.  
47  
48  
49  
50  
51  
52  
53 610  
54  
55 611  
56  
57  
58  
59  
60





PRISMA Flow diagram

## Supplementary File: Search Strategy for Scopus Database

---

### *Search Strategy for the Scopus Database (adapted for other databases)*

---

|                 |                         |                                                                                                 |
|-----------------|-------------------------|-------------------------------------------------------------------------------------------------|
| <b>Date</b>     | 7/4/2018                |                                                                                                 |
| <b>Strategy</b> | #1 AND #2 AND #3 NOT #4 |                                                                                                 |
| <b>Rule</b>     | Domain                  | Search Terms                                                                                    |
| <b>#1</b>       | Area of symptoms        | lumbar or "low back pain" or cervical or "neck pain" or "musculoskeletal pain" or "spinal pain" |
| <b>#2</b>       | Posture                 | postur* or position* or prone or supine or lateral or side lying                                |
| <b>#3</b>       | Sleep                   | sleep* or slumber* or nighttime or nocturnal or bed                                             |
| <b>#4</b>       | Exclusions              | apnoea or apnea or CPAP                                                                         |

---

## Supplementary File: Author Reported Limitations

### *Author Reported Limitations*

| Author                          | Comments                                                                                                                                                                                                                                                                                                                                                                                            |
|---------------------------------|-----------------------------------------------------------------------------------------------------------------------------------------------------------------------------------------------------------------------------------------------------------------------------------------------------------------------------------------------------------------------------------------------------|
| Abanobi et al., 2015            | "Inability to compare the effect of duration of habits and age at onset of habit" (p. 336)<br>"Limited time set aside for the surveillance exercise" (p. 336)                                                                                                                                                                                                                                       |
| Cary et al., 2016               | "Mismatch in time frame of measurement" (p. 6). Recording of sleep posture occurred over 2 nights but participants questioned about symptoms over prior 1 month.                                                                                                                                                                                                                                    |
| Desouzart et al., 2016          | Due to the population studied it was "not possible to use a homogenous sample and larger number of participants." (p. 239)<br>"The four weeks may not have been sufficient to create habits in participants, however, and because of the time limitations of this study, it was not possible to have a longer time." (p. 239)<br>"results are based on the statements of the participants" (p. 239) |
| Gordon, Grimmer and Trott, 2007 | "As small subject numbers constrained confidence in the findings, further research is required into the contributors to waking symptoms. for upright sleepers" (p. 6)                                                                                                                                                                                                                               |

1

| SECTION                                               | ITEM | PRISMA-ScR CHECKLIST ITEM                                                                                                                                                                                                                                                                                  | REPORTED ON PAGE #                                                                             |
|-------------------------------------------------------|------|------------------------------------------------------------------------------------------------------------------------------------------------------------------------------------------------------------------------------------------------------------------------------------------------------------|------------------------------------------------------------------------------------------------|
| <b>TITLE</b>                                          |      |                                                                                                                                                                                                                                                                                                            |                                                                                                |
| Title                                                 | 1    | Identify the report as a scoping review.                                                                                                                                                                                                                                                                   | 1                                                                                              |
| <b>ABSTRACT</b>                                       |      |                                                                                                                                                                                                                                                                                                            |                                                                                                |
| Structured summary                                    | 2    | Provide a structured summary that includes (as applicable): background, objectives, eligibility criteria, sources of evidence, charting methods, results, and conclusions that relate to the review questions and objectives.                                                                              | 2                                                                                              |
| <b>INTRODUCTION</b>                                   |      |                                                                                                                                                                                                                                                                                                            |                                                                                                |
| Rationale                                             | 3    | Describe the rationale for the review in the context of what is already known. Explain why the review questions/objectives lend themselves to a scoping review approach.                                                                                                                                   | 3                                                                                              |
| Objectives                                            | 4    | Provide an explicit statement of the questions and objectives being addressed with reference to their key elements (e.g., population or participants, concepts, and context) or other relevant key elements used to conceptualize the review questions and/or objectives.                                  | 4                                                                                              |
| <b>METHODS</b>                                        |      |                                                                                                                                                                                                                                                                                                            |                                                                                                |
| Protocol and registration                             | 5    | Indicate whether a review protocol exists; state if and where it can be accessed (e.g., a Web address); and if available, provide registration information, including the registration number.                                                                                                             | NA                                                                                             |
| Eligibility criteria                                  | 6    | Specify characteristics of the sources of evidence used as eligibility criteria (e.g., years considered, language, and publication status), and provide a rationale.                                                                                                                                       | 4                                                                                              |
| Information sources*                                  | 7    | Describe all information sources in the search (e.g., databases with dates of coverage and contact with authors to identify additional sources), as well as the date the most recent search was executed.                                                                                                  | 5                                                                                              |
| Search                                                | 8    | Present the full electronic search strategy for at least 1 database, including any limits used, such that it could be repeated.                                                                                                                                                                            | 5                                                                                              |
| Selection of sources of evidence†                     | 9    | State the process for selecting sources of evidence (i.e., screening and eligibility) included in the scoping review.                                                                                                                                                                                      | 5-6                                                                                            |
| Data charting process‡                                | 10   | Describe the methods of charting data from the included sources of evidence (e.g., calibrated forms or forms that have been tested by the team before their use, and whether data charting was done independently or in duplicate) and any processes for obtaining and confirming data from investigators. | 6                                                                                              |
| Data items                                            | 11   | List and define all variables for which data were sought and any assumptions and simplifications made.                                                                                                                                                                                                     | Data items extracted are noted in Table 1, 2, 3, 4 and Supplementary File (pg 7, 8, 10, 12-13) |
| Critical appraisal of individual sources of evidence§ | 12   | If done, provide a rationale for conducting a critical appraisal of included sources of evidence; describe the methods used and                                                                                                                                                                            | 6                                                                                              |

| SECTION                                       | ITEM | PRISMA-ScR CHECKLIST ITEM                                                                                                                                                                       | REPORTED ON PAGE #                                                           |
|-----------------------------------------------|------|-------------------------------------------------------------------------------------------------------------------------------------------------------------------------------------------------|------------------------------------------------------------------------------|
|                                               |      | how this information was used in any data synthesis (if appropriate).                                                                                                                           |                                                                              |
| Synthesis of results                          | 13   | Describe the methods of handling and summarizing the data that were charted.                                                                                                                    | 6                                                                            |
| <b>RESULTS</b>                                |      |                                                                                                                                                                                                 |                                                                              |
| Selection of sources of evidence              | 14   | Give numbers of sources of evidence screened, assessed for eligibility, and included in the review, with reasons for exclusions at each stage, ideally using a flow diagram.                    | PRISMA Supplementary File                                                    |
| Characteristics of sources of evidence        | 15   | For each source of evidence, present characteristics for which data were charted and provide the citations.                                                                                     | Table 1, 2, 3, 4 and Supplementary File (pg 7, 8, 10, 12-13). Reference list |
| Critical appraisal within sources of evidence | 16   | If done, present data on critical appraisal of included sources of evidence (see item 12).                                                                                                      | 12-13                                                                        |
| Results of individual sources of evidence     | 17   | For each included source of evidence, present the relevant data that were charted that relate to the review questions and objectives.                                                           | Table, 1, 2, 3 and 4                                                         |
| Synthesis of results                          | 18   | Summarize and/or present the charting results as they relate to the review questions and objectives.                                                                                            | Table 1, 2, 3 and 4                                                          |
| <b>DISCUSSION</b>                             |      |                                                                                                                                                                                                 |                                                                              |
| Summary of evidence                           | 19   | Summarize the main results (including an overview of concepts, themes, and types of evidence available), link to the review questions and objectives, and consider the relevance to key groups. | 14                                                                           |
| Limitations                                   | 20   | Discuss the limitations of the scoping review process.                                                                                                                                          | 14-16                                                                        |
| Conclusions                                   | 21   | Provide a general interpretation of the results with respect to the review questions and objectives, as well as potential implications and/or next steps.                                       | 15                                                                           |
| <b>FUNDING</b>                                |      |                                                                                                                                                                                                 |                                                                              |
| Funding                                       | 22   | Describe sources of funding for the included sources of evidence, as well as sources of funding for the scoping review. Describe the role of the funders of the scoping review.                 | 16                                                                           |
