# Supplementary material for: Identifying relationships between sleep posture and non-specific spinal symptoms in adults: A scoping review
Source: PubMed Central journal article supplement — BMJ Open. 2019 Jun 28;9(6):e027633. doi: 10.1136/bmjopen-2018-027633 (PMC6609073; doi:10.1136/bmjopen-2018-027633), 2019-06-28
Supplement: bmjopen-2018-027633supp001.pdf [file bmjopen-2018-027633supp001.pdf]

## Supplementary File: Search Strategy for Scopus Database

---

*Search Strategy for the Scopus Database (adapted for other databases)*

---

|                 |                         |                                                                                                 |
|-----------------|-------------------------|-------------------------------------------------------------------------------------------------|
| <b>Date</b>     | 7/4/2018                |                                                                                                 |
| <b>Strategy</b> | #1 AND #2 AND #3 NOT #4 |                                                                                                 |
| <b>Rule</b>     | Domain                  | Search Terms                                                                                    |
| <b>#1</b>       | Area of symptoms        | lumbar or "low back pain" or cervical or "neck pain" or "musculoskeletal pain" or "spinal pain" |
| <b>#2</b>       | Posture                 | postur* or position* or prone or supine or lateral or side lying                                |
| <b>#3</b>       | Sleep                   | sleep* or slumber* or nighttime or nocturnal or bed                                             |
| <b>#4</b>       | Exclusions              | apnoea or apnea or CPAP                                                                         |

---
