# Supplementary material for: Identifying relationships between sleep posture and non-specific spinal symptoms in adults: A scoping review
Source: PubMed Central journal article supplement — BMJ Open. 2019 Jun 28;9(6):e027633. doi: 10.1136/bmjopen-2018-027633 (PMC6609073; doi:10.1136/bmjopen-2018-027633), 2019-06-28
Supplement: bmjopen-2018-027633supp002.pdf [file bmjopen-2018-027633supp002.pdf]

## Supplementary File: Author Reported Limitations

---

*Author Reported Limitations*

---

| Author                          | Comments                                                                                                                                                                                                                                                                                                                                                                                            |
|---------------------------------|-----------------------------------------------------------------------------------------------------------------------------------------------------------------------------------------------------------------------------------------------------------------------------------------------------------------------------------------------------------------------------------------------------|
| Abanobi et al., 2015            | "Inability to compare the effect of duration of habits and age at onset of habit" (p. 336)<br>"Limited time set aside for the surveillance exercise" (p. 336)                                                                                                                                                                                                                                       |
| Cary et al., 2016               | "Mismatch in time frame of measurement" (p. 6). Recording of sleep posture occurred over 2 nights but participants questioned about symptoms over prior 1 month.                                                                                                                                                                                                                                    |
| Desouzar et al., 2016           | Due to the population studied it was "not possible to use a homogenous sample and larger number of participants." (p. 239)<br>"The four weeks may not have been sufficient to create habits in participants, however, and because of the time limitations of this study, it was not possible to have a longer time." (p. 239)<br>"results are based on the statements of the participants" (p. 239) |
| Gordon, Grimmer and Trott, 2007 | "As small subject numbers constrained confidence in the findings, further research is required into the contributors to waking symptoms. for upright sleepers" (p. 6)                                                                                                                                                                                                                               |

---
